# Supplementary material for: Quality of life measured by EQ-5D at different treatment time points for coronary artery disease: protocol for a systematic review and meta-analysis
Source: PubMed Central journal article supplement — BMJ Open. 2020 Jul 29;10(7):e039311. doi: 10.1136/bmjopen-2020-039311 (PMC7394179; doi:10.1136/bmjopen-2020-039311), 2020-07-29
Supplement: bmjopen-2020-039311.draft_revisions.pdf [file bmjopen-2020-039311.draft_revisions.pdf]

# BMJ Open

BMJ Open is committed to open peer review. As part of this commitment we make the peer review history of every article we publish publicly available.

When an article is published we post the peer reviewers' comments and the authors' responses online. We also post the versions of the paper that were used during peer review. These are the versions that the peer review comments apply to.

The versions of the paper that follow are the versions that were submitted during the peer review process. They are not the versions of record or the final published versions. They should not be cited or distributed as the published version of this manuscript.

BMJ Open is an open access journal and the full, final, typeset and author-corrected version of record of the manuscript is available on our site with no access controls, subscription charges or pay-per-view fees (<http://bmjopen.bmj.com>).

If you have any questions on BMJ Open's open peer review process please email [info.bmjopen@bmj.com](mailto:info.bmjopen@bmj.com)

# BMJ Open

## Quality of life measured by EQ-5D at different treatment time points for coronary artery disease: Protocol for a systematic review and meta-analysis

|                               |                                                                                                                                                                                                                                                                                                                                                                                                                                                                                                                                         |
|-------------------------------|-----------------------------------------------------------------------------------------------------------------------------------------------------------------------------------------------------------------------------------------------------------------------------------------------------------------------------------------------------------------------------------------------------------------------------------------------------------------------------------------------------------------------------------------|
| Journal:                      | <i>BMJ Open</i>                                                                                                                                                                                                                                                                                                                                                                                                                                                                                                                         |
| Manuscript ID                 | bmjopen-2020-039311                                                                                                                                                                                                                                                                                                                                                                                                                                                                                                                     |
| Article Type:                 | Protocol                                                                                                                                                                                                                                                                                                                                                                                                                                                                                                                                |
| Date Submitted by the Author: | 10-Apr-2020                                                                                                                                                                                                                                                                                                                                                                                                                                                                                                                             |
| Complete List of Authors:     | Lum, Elaine; Duke-NUS Medical School, Health Services & Systems Research; Queensland University of Technology, School of Clinical Sciences<br>McCreanor, Victoria; Metro North Hospital and Health Service, Jamieson Trauma Institute, Royal Brisbane and Women's Hospital; Queensland University of Technology, Australian Centre for Health Services Innovation<br>Luo, Nan; National University of Singapore, Saw Swee Hock School of Public Health<br>Graves, Nicholas; Duke-NUS Medical School, Health Services & Systems Research |
| Keywords:                     | Coronary heart disease < CARDIOLOGY, Quality in health care < HEALTH SERVICES ADMINISTRATION & MANAGEMENT, HEALTH ECONOMICS                                                                                                                                                                                                                                                                                                                                                                                                             |
|                               |                                                                                                                                                                                                                                                                                                                                                                                                                                                                                                                                         |

SCHOLARONE™  
Manuscripts

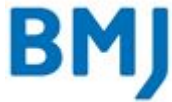

I, the Submitting Author has the right to grant and does grant on behalf of all authors of the Work (as defined in the below author licence), an exclusive licence and/or a non-exclusive licence for contributions from authors who are: i) UK Crown employees; ii) where BMJ has agreed a CC-BY licence shall apply, and/or iii) in accordance with the terms applicable for US Federal Government officers or employees acting as part of their official duties; on a worldwide, perpetual, irrevocable, royalty-free basis to BMJ Publishing Group Ltd ("BMJ") its licensees and where the relevant Journal is co-owned by BMJ to the co-owners of the Journal, to publish the Work in this journal and any other BMJ products and to exploit all rights, as set out in our [licence](#).

The Submitting Author accepts and understands that any supply made under these terms is made by BMJ to the Submitting Author unless you are acting as an employee on behalf of your employer or a postgraduate student of an affiliated institution which is paying any applicable article publishing charge ("APC") for Open Access articles. Where the Submitting Author wishes to make the Work available on an Open Access basis (and intends to pay the relevant APC), the terms of reuse of such Open Access shall be governed by a Creative Commons licence – details of these licences and which [Creative Commons](#) licence will apply to this Work are set out in our licence referred to above.

Other than as permitted in any relevant BMJ Author's Self Archiving Policies, I confirm this Work has not been accepted for publication elsewhere, is not being considered for publication elsewhere and does not duplicate material already published. I confirm all authors consent to publication of this Work and authorise the granting of this licence.

1  
2  
3 1 Title page  
4

5 2 Quality of life measured by EQ-5D at different treatment time points  
6  
7 3 for coronary artery disease: Protocol for a systematic review and  
8  
9 4 meta-analysis  
10

11 5 Elaine Lum<sup>1,2</sup>, Victoria McCreanor<sup>3,4</sup>, Nan Luo<sup>5</sup>, Nicholas Graves<sup>1</sup>  
12

- 13 6 1. Health Services & Systems Research, Duke-NUS Medical School, Singapore.  
14  
15 7 2. School of Clinical Sciences, Queensland University of Technology, Brisbane, Australia.  
16  
17 8 3. Jamieson Trauma Institute, Metro North Hospital & Health Service – Royal Brisbane and  
18 9 Women’s Hospital, Brisbane, Australia.  
19  
20 10 4. Australian Centre for Health Services Innovation, Queensland University of Technology,  
21 11 Brisbane, Australia.  
22  
23 12 5. Saw Swee Hock School of Public Health, National University of Singapore, Singapore.  
24

25  
26 14 Elaine Lum

27 15 Email: [elaine\\_lum@duke-nus.edu.sg](mailto:elaine_lum@duke-nus.edu.sg)

28 16 ORCID: 0000-0002-0853-3018  
29  
30

31 18 Victoria McCreanor

32 19 Email: [victoria.mccreanor@qut.edu.au](mailto:victoria.mccreanor@qut.edu.au)

33 20 ORCID: 0000-0002-0589-8521  
34  
35

36 22 Nan Luo

37 23 Email: [ephln@nus.edu.sg](mailto:ephln@nus.edu.sg)

38 24 ORCID: 0000-0001-7980-6979  
39  
40

41 26 Nicholas Graves

42 27 Email: [n.graves@duke-nus.edu.sg](mailto:n.graves@duke-nus.edu.sg)

43 28 ORCID: 0000-0002-5559-3267  
44  
45

46  
47 30 **Corresponding Author**

48 31 Elaine Lum

49 32 Health Services & Systems Research

50 33 Duke-NUS Medical School

51 34 8 College Road, Singapore 169857

52 35 Email: [elaine\\_lum@duke-nus.edu.sg](mailto:elaine_lum@duke-nus.edu.sg)  
53  
54

55  
56  
57 37 Word count: 3013  
58  
59  
60

1  
2  
3 39 **ABSTRACT**

4  
5 40 **Introduction**

6  
7 41 Cardiovascular disease is estimated to affect 423 million people globally. It caused 18 million deaths  
8 42 in 2017 and is projected to cost USD\$1 trillion by 2030 worldwide. Coronary artery disease (CAD) is  
9 43 the most common type of cardiovascular disease; CAD treatments can affect patients' quality of life.  
10 44 Valuations of quality of life or health utilities are important for economic evaluations to ascertain  
11 45 relative health benefit when comparing treatments, and can be expected to change for individuals  
12 46 over time. The purpose of this systematic review is to estimate the quality of life of CAD patients  
13 47 reported through the EuroQol EQ-5D questionnaire, from short to longer-term time points following  
14 48 different treatments.  
15  
16  
17

18 49  
19 50 **Methods and analysis**

20  
21 51 PubMed, Embase, Web of Science, the Cochrane Database of Systematic Reviews, and the EuroQol  
22 52 website will be systematically searched from 2003 to 2020. Published, peer-reviewed, English  
23 53 language studies assessing quality of life of CAD patients using the EQ-5D will be included. One  
24 54 researcher will conduct the search; two researchers will independently screen titles and abstracts for  
25 55 potential inclusion. Full texts of potentially eligible studies will be retrieved for a second round of  
26 56 independent screening against inclusion and exclusion criteria by two researchers. The final list of  
27 57 included studies will be assessed for risk of bias using the Rob 2 and ROBINS-I tools for randomized  
28 58 and non-randomized studies, respectively. Data extraction will be done by one researcher, with data  
29 59 extraction for a random 10% of included studies checked by a second researcher. Mean utility  
30 60 weights for individual studies will be combined using random effects model meta-analyses. A model  
31 61 will be run separately for each time point and treatment. Treatment time points of interest include  
32 62 baseline, 30 days, 6 months, 12-24 months, and more than 24 months. Subgroup analysis of patients  
33 63 with diabetes who received interventional treatments — coronary artery bypass graft or  
34 64 percutaneous coronary intervention with or without stents, will be conducted for the same selected  
35 65 time points.  
36  
37  
38  
39  
40  
41  
42

43 67 **Ethics and dissemination:** Ethics approval is not required for systematic reviews. Results of the  
44 68 review will be disseminated via publication in a peer-reviewed journal.  
45  
46

47 69  
48 70 **PROSPERO registration number:** Pending  
49  
50

51 71  
52 72 **Key words:**

53 73 Coronary artery disease; quality of life; EQ-5D; coronary artery bypass graft; percutaneous coronary  
54 74 intervention.  
55  
56  
57  
58  
59  
60 77

78 **ARTICLE SUMMARY****Strengths and limitations of this study**

- The search strategy is designed to be comprehensive and aligned with the Peer Review of Electronic Search Strategies (PRESS) guidelines.(1)
- We will use PubMed as one of the databases instead of Medline to capture articles not yet indexed with MeSH terms and those released ahead of print.
- A final search will be run just before data synthesis begins to find any new articles that should be included in the analysis, since the search.
- The systematic review protocol was developed based on the Preferred Reporting Items for Systematic Reviews and Meta-Analyses for Protocols (PRISMA-P) guidelines.(2)
- Inclusion of studies that are available as full text and in English only may lead to language bias.

79

80 **INTRODUCTION**

81 Cardiovascular disease affects 423 million people globally(3) and causes 31% of deaths annually with  
 82 18 million deaths in 2017.(4) Cardiovascular disease is projected to cost USD\$1 trillion by 2030 in  
 83 direct healthcare costs, lost productivity due to disability or premature death, and time lost from  
 84 work.(5) Coronary artery disease (CAD) is the most common type of cardiovascular disease.(6)  
 85 Patients with CAD are treated with long-term medications, lifestyle modifications, and/or  
 86 interventional procedures.(7) Commonly used interventional procedures include coronary artery  
 87 bypass graft (CABG) and percutaneous coronary intervention (PCI) with or without stents.(7)

88 Individuals living with CAD experience changes in their quality of life.(8-11) CAD treatments can  
 89 affect quality of life in either a positive or negative direction; and this can be expected to change  
 90 over a period of time, particularly in the immediate vs. longer-term period post-CABG or PCI.(8, 9)  
 91 Quality of life estimates as measured by health utilities are important for economic evaluations to  
 92 determine relative health benefit when comparing treatments.(12) Health utilities are the numerical  
 93 value reflecting the strength of an individual's preference for specific health-related outcomes,  
 94 where 0 represents death and 1 represents full health.(12) Together with length of life, health  
 95 utilities are used to calculate quality-adjusted life years (QALYs).(12) QALYs are used in cost-  
 96 effectiveness studies to enable direct comparisons between treatment options.(12)

97 For chronic illnesses such as coronary artery disease, health utilities over time are particularly  
 98 important so as not to bias estimates of cost-effectiveness toward treatments that show early but  
 99 unsustained health benefits, and against those which may only show health benefits in the longer-  
 100 term.(8) However, health utilities over various time points can be logistically challenging and  
 101 expensive to collect; and estimates need to be as robust as possible given their use in informing  
 102 medical decision-making and health-related policies. Hence, to reduce research waste and to  
 103 increase the robustness of utility estimates, systematic reviews and meta-analyses of health utilities  
 104 from single studies are conducted.

105 Previous reviews and meta-analyses of health utilities in cardiovascular diseases focused on either  
 106 summarising preference weights of various health-related quality of life instruments(13) or in

1  
2  
3 107 synthesising the evidence on the validity and reliability of the EQ-5D.(14) Although the 2010 review  
4 108 by Dyer et al. summarised utility scores of the EQ-5D,(14) a number of important studies such as the  
5 109 ORBITA trial have since been published.(15) We will focus on studies that used the EQ-5D to  
6 110 measure health-related quality of life, as it is the most widely used generic preference-based  
7 111 instrument.(16) The EQ-5D is also the preferred instrument for Health Technology Assessments by  
8 112 the UK National Institute for Health and Care Excellence (NICE), and the Zorginstituut Nederland  
9 113 (ZIN).(16, 17)

12 114 The aim of this study is to estimate the quality of life of people with CAD quantified by the EQ-5D at  
13 115 selected time points (short-, mid- and longer-term) following the initiation of different treatments.  
14  
15

16 116

#### Box 1. Definitions

- Coronary artery disease: Any one of the following conditions — coronary atherosclerosis, angina, acute coronary syndromes i.e. unstable angina, myocardial infarction (STEMI or NSTEMI).
- Optimal medical therapy: A combination of medications (pharmacological) to treat disease progression and symptoms, along with lifestyle modifications (non-pharmacological).
- Interventional procedures: Coronary artery bypass graft (CABG), percutaneous coronary intervention (PCI) with — bare metal stent (PCI-BMS), drug-eluting stent (PCI-DES), absorbable stent (PCI-AS) or without stents (balloon angioplasty), carried out in addition to optimal medical therapy.
- Tariff: Preference weight which reflects the preference on different health states of a particular population.

34 117

## 36 118 METHODS AND ANALYSIS

### 38 119 Study design

39 120 The study protocol has been developed based on the Preferred Reporting Items for Systematic  
40 121 Reviews and Meta-Analyses for Protocols (PRISMA-P) guidelines.(2)  
41  
42

43 122

### 44 123 Search strategy

#### 46 124 Databases

47 125 The following databases and sources will be searched: PubMed, Embase (Ovid), Web of Science, the  
48 126 Cochrane Database of Systematic Reviews, and the EuroQol website.

49 127 A previous study demonstrated that to optimize the search when conducting systematic reviews, the  
50 128 following four electronic databases should be searched as a minimum: Medline, Embase, Web of  
51 129 Science, and Google Scholar.(18) We selected PubMed as it has a larger repository than Medline,  
52 130 including additional life sciences journals, citations that are “ahead of print” and those not yet  
53 131 indexed with MeSH terms.(19) We did not select Google Scholar as the search may not be replicable.  
54  
55

56 132

57 133

1  
2  
3 134 *Timeframe*  
4

5 135 The search will encompass the following period: 1 January 2003 to the date of the first search in  
6 136 2020. Where the search functions of particular databases do not allow day/month/year to be  
7 137 specified, we will use the month and year e.g. January 2003 to March 2020.

9 138 The lower date limit of January 2003 was selected as the first commercially available drug-eluting  
10 139 stent was approved by the US Food and Drug Administration in that year.(20) The upper date limit  
11 140 will be the date of the first search conducted (within the second search in the three-step strategy  
12 141 below); and will subsequently be used as the upper date limit when searching the remaining  
13 142 databases. This strategy ensures that the date range for searches is consistent across all databases.

16 143 *Search strategy*  
17

18 144 The search aims to find both published and “ahead of print” publications. A three-step strategy will  
19 145 be used.

- 21 146 1. First search (EL): Initial search limited to PubMed only, followed by analysis of text words in  
22 147 the (a) titles and abstracts of retrieved papers (keywords); and (b) index terms used to  
23 148 describe the articles (metadata, tags). Keywords for the initial search: coronary artery  
24 149 disease; EQ-5D; EQ-5D-3L; EQ-5D-5L; EuroQoL; treatment. Output: The search string for the  
25 150 systematic review will be constructed.
- 28 151 2. Second search (EL): PubMed, Embase (Ovid), Web of Science, the Cochrane Database of  
29 152 Systematic Reviews, and the EuroQol website will then be searched using the search string  
30 153 constructed from the previous step. The yield from this step will be subjected to title and  
31 154 abstract screening for potential inclusion (first screening), followed by retrieval of full text  
32 155 articles, and screening of full text articles for inclusion (second screening).
- 35 156 3. Third search (EL): The reference list of included articles will be manually examined to identify  
36 157 additional studies for inclusion in the systematic review.

38 158 Finally, as per good practice, searches will be re-run just before data synthesis to identify any  
39 159 new studies that should be retrieved for inclusion.

41 160 The following is a preliminary example of a search strategy for PubMed which will be  
42 161 refined/confirmed after the first search outlined above:

44 162 (((((((((((coronary artery disease) OR (coronary heart disease)) OR (coronary atherosclerosis)) OR  
45 163 (myocardial infarction)) OR (acute coronary syndrome)) OR (angina)))) AND ((EQ-5D) OR  
46 164 (EuroQol)))) NOT ((editorial)) OR (conference proceeding))

48 165 The final search strategy will be provided to PROSPERO once the review has been completed.  
49 166

52 167 **Types of studies to be included**  
53

54 168 All types of studies will be included so long as inclusion criteria are met. Systematic reviews  
55 169 identified from the search will be examined for relevant studies for inclusion.  
56

57 170

58 171  
59  
60



1  
2  
3 172 *Inclusion criteria*  
4

- 5 173 • Studies which report on quality of life post-treatment for coronary artery disease —  
6 174 coronary atherosclerosis, angina, acute coronary syndromes i.e. unstable angina, myocardial  
7 175 infarction (STEMI or NSTEMI)  
8  
9 176 • Treatments may be pharmacological, non-pharmacological (e.g. lifestyle modifications), or  
10 177 interventional procedures (e.g. coronary artery bypass graft, percutaneous coronary  
11 178 intervention with or without stents)  
12  
13  
14 179 • Preference based utility values for quality of life using EQ-5D  
15  
16 180 • Studies reported in English  
17  
18 181

19 182 *Exclusion criteria*  
20

- 21 183 • Editorials, letters, and conference proceedings  
22  
23 184 • Study protocols or studies-in-progress e.g. clinical trial registrations  
24  
25 185 • Studies which reported only EQ-5D Visual Analogue Scale outcomes  
26  
27 186 • Studies which reported EQ-5D values derived from mapping other measures of health  
28 187 outcomes  
29  
30 188 • Studies which reported quality of life from other studies, without contributing new data  
31  
32 189 • Studies which reported on subgroups of a previously reported dataset  
33  
34 190 • Highly specific patient groups e.g. studies examining coronary artery disease in people with  
35 191 depression  
36  
37 192 • For post-treatment estimates, treatment was not specified e.g. did not report the type of  
38 193 stent used  
39  
40 194 • Studies on enhanced external counter pulsation (EECP) therapy  
41  
42 195 • Full text article not available  
43  
44 196

45 197 **Condition or domain being studied**  
46

47 198 Quality of life (health utilities) at various treatment time points for coronary artery disease.  
48  
49 199

50 200 **Participants/population**  
51

52 201 Inclusion: Adults (18 years old and above) diagnosed with coronary artery disease using criteria such  
53 202 as the International Classification of Diseases and Related Health Problems (ICD-10).

55 203 Exclusion: People under 18 years old. Highly specific patient groups e.g. studies examining coronary  
56 204 artery disease in people with depression  
57  
58 205  
59  
60 206

1  
2  
3 **207 Interventions**

4  
5 208 Pharmacological, non-pharmacological, and interventional procedures.

6  
7 209 Pharmacological interventions are medications used to manage or treat coronary artery disease  
8 210 and/or prevent secondary cardiovascular events, and may include cholesterol-modifying  
9 211 medications, antiplatelets, beta blockers, calcium channel blockers, ranolazine, nitrates, angiotensin-  
10 212 converting enzyme (ACE) inhibitors, angiotensin II receptor blockers (ARB).

11  
12 213 Non-pharmacological interventions include lifestyle modifications such as smoking cessation,  
13 214 choosing healthy foods, engaging in regular physical activity/exercise, removing excess weight, and  
14 215 reducing stress.

15  
16 216 Interventional procedures: Coronary artery bypass graft (CABG) or percutaneous coronary  
17 217 intervention (PCI) with or without stents (e.g. balloon angioplasty). Stents used in PCI may be bare  
18 218 metal stents, drug-eluting stents, absorbable stents, or absorbable drug-eluting stents.

19  
20  
21 219

22  
23 **220 Comparator/ Control**

24  
25 221 The review will compare health utilities reported from patients receiving the treatments listed above  
26 222 at selected treatment time points.

27  
28 223

29  
30 **224 Context**

31 225 Any setting — inpatient, outpatient, community.

32  
33 226

34  
35 **227 Main outcome**

36 228 Quality of life health utilities i.e. EQ-5D-3L and EQ-5D-5L at selected treatment time points.

37  
38 229 *Timing and effect measures*

39  
40 230 Baseline, 30 days, 6 months (short term), 12-24 months (mid-term), more than 24 months (long  
41 231 term).

42  
43 232

44  
45 **233 Study screening**

46  
47 234 Yields from searches will be exported into the reference manager software EndNote x9  
48 235 ([www.endnote.com](http://www.endnote.com)). Duplicates will be removed. Two copies of the EndNote library will be made for  
49 236 two researchers (EL, VM) to independently screen study titles and abstracts against inclusion and  
50 237 exclusion criteria. Any discrepancies will be resolved via discussion; a third researcher (NG) will  
51 238 moderate if consensus is not reached.

52  
53  
54 239 Full text records of the included papers from the first round of screening are then retrieved. Studies  
55 240 will be excluded if full text is not available at this stage or not in English.

56  
57 241 Next, all full text records retrieved will be independently assessed against the same inclusion and  
58 242 exclusion criteria by two researchers (EL, VM). Reasons for exclusion will be documented. Any  
59  
60

243 discrepancies will be resolved via discussion; a third researcher (NG) will moderate if consensus is  
244 not reached. Study selection will be illustrated as a PRISMA flow diagram.

245

### 246 **Risk of bias (quality) assessment**

247 For included studies, we will use the RoB 2 tool to assess risk of bias at the study level in randomised  
248 trials and the ROBINS-I tool for non-randomised studies.(21, 22) The RoB 2 tool prompts judgements  
249 regarding biases in five domains: bias arising from the randomisation process, those due to  
250 derivations from intended interventions, missing outcome data, measurement of the outcome, and  
251 selection of the reported result.(21) The ROBINS-I tool covers seven domains: bias due to  
252 confounding, participant selection, classification of interventions, deviations from intended  
253 interventions, missing data, measurement of outcomes, and selection of the reported results.(22)

254 One researcher (EL) will complete the risk of bias/quality appraisal; a second researcher (VM) will  
255 check the assessment for ten percent of the included studies. Any discrepancies will be resolved via  
256 discussion; a third researcher (NG) will moderate if consensus is not reached. All studies will be  
257 included in the data synthesis; in addition, studies with low risk of bias will also be analysed  
258 separately.

259

### 260 **Data extraction**

261 Data extraction will be conducted on all studies that are included. We will take the following  
262 approaches to data extraction to ensure published estimates are not counted more than once.

- 263 • Where there are multiple analyses for the same dataset, we will use only one estimate per  
264 subgroup per time point
- 265 • We will use the broadest grouping available for each dataset. For example, if a study reports  
266 on all patients with bypass surgery and another reports on subgroups of patients with  
267 bypass surgery by their obesity status from the same dataset, we will include only the overall  
268 bypass surgery utility weights, not the obesity subgroups
- 269 • Where a paper provides updated findings (e.g. for a later time point) from a previous  
270 published study of the same quality of life data collection, we will only include data for the  
271 later time point from the updated analysis

272 For baseline or time zero utility measurements, we will note when the EQ-5D questionnaire was  
273 given to patients.

274 For each included study, the following data will be extracted:

- 275 • Authors
- 276 • Publication date
- 277 • Country/countries where study was done
- 278 • Baseline presentation of patients
- 279 • Treatment received e.g. coronary artery bypass graft, percutaneous coronary intervention  
280 and type of stent used
- 281 • Survey instrument (e.g. EQ-5D, EQ-5D-5L)

- 282 • Location of participants (e.g. hospital – inpatient, hospital – outpatient, home)
- 283 • Administration mode of survey (e.g. interviewer, self-completion)
- 284 • Respondent identity (e.g. self, proxy)
- 285 • Language of survey
- 286 • Tariff (preference weights) used to generate utility weights from the EQ-5D results
- 287 • Mean utility weights reported for each treatment and time point combination
- 288 • Standard error or relevant statistics to enable calculation of the standard error i.e. standard
- 289 deviation and sample size
- 290 • Number of participants in the group, mean age, percentage of men and women in the group
- 291 • Percentage of participants with diabetes
- 292 • Percentage of participants who currently smoke tobacco

293 Data extraction will be piloted by one researcher (EL) with five studies randomly selected from the  
 294 included papers. A second researcher (VM) will check the pilot data extraction. Discrepancies will be  
 295 resolved via discussion. A third researcher (NG) will moderate if discrepancies are not resolved.  
 296 Subsequently, one researcher will complete data extraction of the remaining studies (EL). A second  
 297 researcher will check the data extracted for a random ten percent of included papers (VM). Similarly,  
 298 discrepancies will be resolved via discussion; a third researcher (NG) will moderate if any  
 299 discrepancies are unresolved.

300 An Excel spreadsheet will be set up for data extraction.

### 302 **Strategy for data synthesis**

303 Mean utility weights for individual studies will be combined using random effects model meta-  
 304 analyses. We will use the R package, metafor,(23) to do this. A model will be run separately for each  
 305 time point and treatment.

306 For utility weights following interventional treatments, we will include all studies related to that  
 307 particular treatment. Each type of interventional procedure will be analysed separately e.g. CABG,  
 308 PCI without stent (balloon angioplasty), PCI with bare metal stent (PCI-BMS), PCI with drug-eluting  
 309 stent (PCI-DES), PCI with absorbable stent (PCI-AS).

310 For re-hospitalisations for acute coronary artery disease, we will use estimates only from studies  
 311 related to acute presentations. For other re-hospitalisations we will use estimates only from studies  
 312 not related to acute presentations.

### 314 **Analysis of subgroups or subsets**

315 Subgroup analysis of patients with diabetes who received CABG, balloon angioplasty, PCI-BMS, PCI-  
 316 DES, PCI-AS (if any) will be conducted for the same selected time points regarding the EuroQoL EQ-  
 317 5D. Previous studies have demonstrated increased morbidity and/or mortality among people with  
 318 diabetes who received coronary revascularisation procedures compared to those without  
 319 diabetes.(24, 25) Hence, the utility value of the quality of life may differ between patients with  
 320 diabetes and those without.

1  
2  
3 322 **Type and method of review**  
4

5 323 Systematic review, Meta-analysis.  
6  
7 324

8 325 **Anticipated or actual start date**  
9

10 326 27 February 2020.  
11  
12 327

13  
14 328 **Anticipated completion date**

15 329 30 June 2020.  
16  
17 330

18  
19 331 **Patient and public involvement**  
20

21 332 No patient or public involvement.  
22  
23 333

24 334 **Ethics and dissemination**

25  
26 335 Ethical approval is not required for systematic review protocols. Results of the review will be  
27 336 disseminated via publication in a peer-reviewed journal. In addition, should the findings of the  
28 337 review warrant a re-examination of current clinical practice, a brief will be prepared and sent to  
29 338 relevant lead agencies in Australia and Singapore e.g. Ministry of Health (Singapore), Department of  
30 339 Health (Australia), Deeble Institute (Australia).  
31  
32 340

33  
34  
35 341 **Data deposition and curation**

36  
37 342 Data extraction tables will be deposited in an open data repository such as the Open Science  
38 343 Framework (<https://osf.io/>).  
39  
40 344

41  
42 345 **Amendments**

43 346 All amendments to the protocol will be dated, described, accompanied by a rationale, and  
44 347 documented in PROSPERO post-registration.  
45  
46 348

47  
48  
49 349 **DISCUSSION**

50 350 To date, there is only one systematic review of patient reported quality of life focussed on EQ-5D  
51 351 which was published in 2010 by Dyer et al.(14) Given that important clinical studies in the  
52 352 cardiovascular field have since been published, another review is timely.

53  
54  
55 353 Our findings will be useful for economic evaluations to determine relative health benefit when  
56 354 comparing treatments. Knowing the health utilities at various treatment time points following  
57 355 different CAD treatments will facilitate cost-effective policy-making, inform clinical guidelines and  
58 356 practice changes. This study will also be useful to other researchers and decision-makers who wish  
59 357 to work on cost-effectiveness analyses for cardiology. In Singapore where this study is being

1  
2  
3 358 undertaken, the health utilities estimated by this study will add value to the national longitudinal  
4 359 database of cardiology patients — SingCLOUD,(26) and other disease registries here and elsewhere  
5  
6 360 that have not collected EQ-5D data.

7  
8 361 Limitations are that non-English language articles and studies that use other health-related quality of  
9 362 life instruments will be excluded. We chose to focus on EQ-5D generated health utilities as it is the  
10 363 most widely used generic preference-based measure due to its robustness, reliability, and  
11 364 responsiveness across many health conditions and countries.(16) Health utilities derived from  
12 365 different instruments are not interchangeable with the EQ-5D and there are no straightforward  
13 366 methods for translation.(27)

14  
15  
16 367

#### 17 368 **AUTHOR CONTRIBUTIONS**

19 369 The systematic review was conceptualised by all authors. EL drafted the protocol, which was  
20 370 critically reviewed by VM, NL and NG. All protocol authors read, provided feedback, and approved  
21 371 the final manuscript. Database searches will be completed by EL; articles will be screened for  
22 372 inclusion and exclusion by EL and VM; data extraction will be led by EL. Data analyses will be done by  
23 373 EL and VM, and reviewed by NL and NG. The guarantor of the review is NG.

24  
25  
26 374

#### 27 375 **FUNDING STATEMENT**

28  
29 376 This research received no specific grant from any funding agency in the public, commercial or not-  
30 377 for-profit sectors.

31  
32  
33 378

#### 34 379 **COMPETING INTERESTS STATEMENT**

35 380 No competing interests to declare.

36  
37  
38 381

#### 39 382 **REFERENCES**

- 40  
41  
42 383 1. McGowan J, Sampson M, Salzwedel DM, Cogo E, Foerster V, Lefebvre C. PRESS Peer Review of  
43 384 Electronic Search Strategies: 2015 Guideline Statement. *Journal of Clinical Epidemiology*.  
44 385 2016;75:40-6.  
45 386 2. Shamseer L, Moher D, Clarke M, Ghersi D, Liberati A, Petticrew M, et al. Preferred reporting  
46 387 items for systematic review and meta-analysis protocols (PRISMA-P) 2015: elaboration and  
47 388 explanation. *BMJ : British Medical Journal*. 2015;349:g7647.  
48 389 3. Roth GA, Johnson C, Abajobir A, Abd-Allah F, Abera SF, Abyu G, et al. Global, Regional, and  
49 390 National Burden of Cardiovascular Diseases for 10 Causes, 1990 to 2015. *J Am Coll Cardiol*.  
50 391 2017;70(1):1-25.  
51 392 4. Mensah GA, Roth GA, Fuster V. The Global Burden of Cardiovascular Diseases and Risk Factors. *J*  
52 393 *Am Coll Cardiol*. 2019;74(20):2529.  
53 394 5. Bloom D, Cafiero E, Jane-Llopis E, Abrahams-Gessel S, Bloom L, Fathima S, et al. The Global  
54 395 Economic Burden of Non-communicable Diseases. Geneva: World Economic Forum; 2011.  
55 396 6. Centers for Disease Control and Prevention. Heart Disease Facts 2019 [cited 2020 March 26].  
56 397 Available from: <https://www.cdc.gov/heartdisease/facts.htm>.  
57 398 7. NIH National Heart Lung and Blood Institute. Coronary Heart Disease 2020 [cited 2020 March  
58 399 26]. Available from: <https://www.nhlbi.nih.gov/health-topics/coronary-heart-disease>.

1  
2  
3  
4  
5  
6  
7  
8  
9  
10  
11  
12  
13  
14  
15  
16  
17  
18  
19  
20  
21  
22  
23  
24  
25  
26  
27  
28  
29  
30  
31  
32  
33  
34  
35  
36  
37  
38  
39  
40  
41  
42  
43  
44  
45  
46  
47  
48  
49  
50  
51  
52  
53  
54  
55  
56  
57  
58  
59  
60

- 400 8. Sajobi Tolulope T, Wang M, Awosoga O, Santana M, Southern D, Liang Z, et al. Trajectories of  
401 Health-Related Quality of Life in Coronary Artery Disease. *Circulation: Cardiovascular Quality  
402 and Outcomes*. 2018;11(3):e003661.
- 403 9. Yang L-X, Zhou Y-J, Wang Z-J, Li Y-P, Chai M. Impact of invasive treatment strategy on health-  
404 related quality of life six months after non-ST-elevation acute coronary syndrome. *J Geriatr  
405 Cardiol*. 2014;11(3):206-11.
- 406 10. Sipötz J, Friedrich O, Höfer S, Benzer W, Chatsakos T, Gaul G, et al. Health related quality of life  
407 and mental distress after PCI: restoring a state of equilibrium. *Health Qual Life Outcomes*.  
408 2013;11:144-.
- 409 11. Gencer B, Girardin F. Coronary artery disease is associated with persistent lower quality of life  
410 in women. *Open Heart*. 2015;2(1):e000305.
- 411 12. Whitehead SJ, Ali S. Health outcomes in economic evaluation: the QALY and utilities. *British  
412 Medical Bulletin*. 2010;96(1):5-21.
- 413 13. Stevanović J, Pechlivanoglou P, Kampinga MA, Krabbe PFM, Postma MJ. Multivariate Meta-  
414 Analysis of Preference-Based Quality of Life Values in Coronary Heart Disease. *PLOS ONE*.  
415 2016;11(3):e0152030.
- 416 14. Dyer MTD, Goldsmith KA, Sharples LS, Buxton MJ. A review of health utilities using the EQ-5D in  
417 studies of cardiovascular disease. *Health Qual Life Outcomes*. 2010;8(1):13.
- 418 15. Al-Lamee R, Thompson D, Dehbi H-M, Sen S, Tang K, Davies J, et al. Percutaneous coronary  
419 intervention in stable angina (ORBITA): a double-blind, randomised controlled trial. *The Lancet*.  
420 2018;391(10115):31-40.
- 421 16. Brazier JE, Rowen D, Lloyd A, Karimi M. Future Directions in Valuing Benefits for Estimating  
422 QALYs: Is Time Up for the EQ-5D? *Value in Health*. 2019;22(1):62-8.
- 423 17. National Institute for Health and Care Excellence. Position statement on use of the EQ-5D-5L  
424 value set for England (updated October 2019) 2019 [cited 2020 Mar 31]. Available from:  
425 [https://www.nice.org.uk/about/what-we-do/our-programmes/nice-guidance/technology-  
426 appraisal-guidance/eq-5d-5l](https://www.nice.org.uk/about/what-we-do/our-programmes/nice-guidance/technology-appraisal-guidance/eq-5d-5l).
- 427 18. Bramer WM, Rethlefsen ML, Kleijnen J, Franco OH. Optimal database combinations for  
428 literature searches in systematic reviews: a prospective exploratory study. *Systematic Reviews*.  
429 2017;6(1):245.
- 430 19. NIH National Library of Medicine. MEDLINE, PubMed, and PMC (PubMed Central): How are  
431 they different? 2019 [Available from: <https://www.nlm.nih.gov/bsd/difference.html>].
- 432 20. Iqbal J, Gunn J, Serruys PW. Coronary stents: historical development, current status and future  
433 directions. *British Medical Bulletin*. 2013;106(1):193-211.
- 434 21. Sterne JAC, Savović J, Page MJ, Elbers RG, Blencowe NS, Boutron I, et al. RoB 2: a revised tool  
435 for assessing risk of bias in randomised trials. *BMJ*. 2019;366:l4898.
- 436 22. Sterne JAC, Hernán MA, Reeves BC, Savović J, Berkman ND, Viswanathan M, et al. ROBINS-I: a  
437 tool for assessing risk of bias in non-randomized studies of interventions. *BMJ*. 2016;355:i4919.
- 438 23. Viechtbauer W. Conducting meta-analyses in R with the metafor package. *Journal of Statistical  
439 Software*. 2010;36(3):1-48.
- 440 24. Armstrong EJ, Waltenberger J, Rogers JH. Percutaneous coronary intervention in patients with  
441 diabetes: current concepts and future directions. *J Diabetes Sci Technol*. 2014;8(3):581-9.
- 442 25. Kereiakes D. Percutaneous coronary intervention in diabetic patients - Improving outcomes  
443 through advances in catheter-based and adjunctive pharmacotherapeutic strategies.  
444 *Interventional Cardiology*. 2008;3(1):33-6.
- 445 26. Yeo KK, Ong H-Y, Chua T, Lim ZJ, Yap J, Ho HH, et al. Building a Longitudinal National Integrated  
446 Cardiovascular Database — Lessons Learnt From SingCLOUD —. *Circulation Reports*.  
447 2020;2(1):33-43.
- 448 27. Longworth L, Rowen D. Mapping to Obtain EQ-5D Utility Values for Use in NICE Health  
449 Technology Assessments. *Value in Health*. 2013;16(1):202-10.

# Reporting checklist for protocol of a systematic review.

Based on the PRISMA-P guidelines.

## Instructions to authors

Complete this checklist by entering the page numbers from your manuscript where readers will find each of the items listed below.

Your article may not currently address all the items on the checklist. Please modify your text to include the missing information. If you are certain that an item does not apply, please write "n/a" and provide a short explanation.

Upload your completed checklist as an extra file when you submit to a journal.

In your methods section, say that you used the PRISMA-P reporting guidelines, and cite them as:

Moher D, Shamseer L, Clarke M, Ghersi D, Liberati A, Petticrew M, Shekelle P, Stewart LA. Preferred Reporting Items for Systematic Review and Meta-Analysis Protocols (PRISMA-P) 2015 statement. Syst Rev. 2015;4(1):1.

|                | Reporting Item                                                                                         | Page Number        |
|----------------|--------------------------------------------------------------------------------------------------------|--------------------|
| <b>Title</b>   |                                                                                                        |                    |
| Identification | <a href="#">#1a</a> Identify the report as a protocol of a systematic review                           | 1, Title           |
| Update         | <a href="#">#1b</a> If the protocol is for an update of a previous systematic review, identify as such | n/a, not an update |

### Title

|                | Reporting Item                                                               | Page Number |
|----------------|------------------------------------------------------------------------------|-------------|
| Identification | <a href="#">#1a</a> Identify the report as a protocol of a systematic review | 1, Title    |

|        |                                                                                                        |                    |
|--------|--------------------------------------------------------------------------------------------------------|--------------------|
| Update | <a href="#">#1b</a> If the protocol is for an update of a previous systematic review, identify as such | n/a, not an update |
|--------|--------------------------------------------------------------------------------------------------------|--------------------|



1 **Registration**  
2  
3

4 [#2](#) If registered, provide the name of the registry 2, pending PROSPERO  
5  
6 (such as PROSPERO) and registration registration  
7  
8 number  
9  
10

11 **Authors**  
12  
13  
14

15 **Contact**

16 [#3a](#) Provide name, institutional affiliation, e-mail 1  
17 address of all protocol authors; provide  
18 physical mailing address of corresponding  
19 author  
20  
21  
22  
23

24 **Contribution**

25 [#3b](#) Describe contributions of protocol authors 11, Author Contributions  
26 and identify the guarantor of the review  
27  
28  
29

30 **Amendments**  
31  
32

33 [#4](#) If the protocol represents an amendment of 10, Amendments  
34 a previously completed or published  
35 protocol, identify as such and list changes;  
36 otherwise, state plan for documenting  
37 important protocol amendments  
38  
39  
40  
41  
42  
43  
44

45 **Support**  
46  
47

48 **Sources**

49 [#5a](#) Indicate sources of financial or other support 11, Funding Statement  
50 for the review  
51  
52  
53

54 **Sponsor**

55 [#5b](#) Provide name for the review funder and / or n/a, no funder or  
56 sponsor sponsor  
57  
58  
59

|    |                      |                     |                                                |                         |
|----|----------------------|---------------------|------------------------------------------------|-------------------------|
| 1  | Role of sponsor or   | <a href="#">#5c</a> | Describe roles of funder(s), sponsor(s), and / | n/a, no funder or       |
| 2  |                      |                     | or institution(s), if any, in developing the   | sponsor                 |
| 3  | funder               |                     | protocol                                       |                         |
| 4  |                      |                     |                                                |                         |
| 5  |                      |                     |                                                |                         |
| 6  |                      |                     |                                                |                         |
| 7  |                      |                     |                                                |                         |
| 8  |                      |                     |                                                |                         |
| 9  | <b>Introduction</b>  |                     |                                                |                         |
| 10 |                      |                     |                                                |                         |
| 11 |                      |                     |                                                |                         |
| 12 | Rationale            | <a href="#">#6</a>  | Describe the rationale for the review in the   | 3-4, Introduction       |
| 13 |                      |                     | context of what is already known               |                         |
| 14 |                      |                     |                                                |                         |
| 15 |                      |                     |                                                |                         |
| 16 |                      |                     |                                                |                         |
| 17 | Objectives           | <a href="#">#7</a>  | Provide an explicit statement of the           | 4, Introduction         |
| 18 |                      |                     | question(s) the review will address with       |                         |
| 19 |                      |                     | reference to participants, interventions,      |                         |
| 20 |                      |                     | comparators, and outcomes (PICO)               |                         |
| 21 |                      |                     |                                                |                         |
| 22 |                      |                     |                                                |                         |
| 23 |                      |                     |                                                |                         |
| 24 |                      |                     |                                                |                         |
| 25 |                      |                     |                                                |                         |
| 26 |                      |                     |                                                |                         |
| 27 | <b>Methods</b>       |                     |                                                |                         |
| 28 |                      |                     |                                                |                         |
| 29 |                      |                     |                                                |                         |
| 30 | Eligibility criteria | <a href="#">#8</a>  | Specify the study characteristics (such as     | 4, Study design         |
| 31 |                      |                     | PICO, study design, setting, time frame) and   | 5, Timeframe of         |
| 32 |                      |                     | report characteristics (such as years          | searches                |
| 33 |                      |                     | considered, language, publication status) to   | 6-7, PICO; Context      |
| 34 |                      |                     | be used as criteria for eligibility for the    | (setting)               |
| 35 |                      |                     | review                                         | 5-6, Types of studies;  |
| 36 |                      |                     |                                                | Inclusion and Exclusion |
| 37 |                      |                     |                                                | criteria                |
| 38 |                      |                     |                                                |                         |
| 39 |                      |                     |                                                |                         |
| 40 |                      |                     |                                                |                         |
| 41 |                      |                     |                                                |                         |
| 42 |                      |                     |                                                |                         |
| 43 |                      |                     |                                                |                         |
| 44 |                      |                     |                                                |                         |
| 45 |                      |                     |                                                |                         |
| 46 |                      |                     |                                                |                         |
| 47 |                      |                     |                                                |                         |
| 48 | Information          | <a href="#">#9</a>  | Describe all intended information sources      | 4, Databases            |
| 49 |                      |                     | (such as electronic databases, contact with    | 5, Timeframe of         |
| 50 | sources              |                     | study authors, trial registers or other grey   | searches (dates of      |
| 51 |                      |                     | literature sources) with planned dates of      | coverage)               |
| 52 |                      |                     | coverage                                       |                         |
| 53 |                      |                     |                                                |                         |
| 54 |                      |                     |                                                |                         |
| 55 |                      |                     |                                                |                         |
| 56 |                      |                     |                                                |                         |
| 57 |                      |                     |                                                |                         |
| 58 |                      |                     |                                                |                         |
| 59 |                      |                     |                                                |                         |
| 60 |                      |                     |                                                |                         |

|    |                   |                      |                                                   |                            |
|----|-------------------|----------------------|---------------------------------------------------|----------------------------|
| 1  | Search strategy   | <a href="#">#10</a>  | Present draft of search strategy to be used       | 5, Search strategy         |
| 2  |                   |                      | for at least one electronic database,             |                            |
| 3  |                   |                      | including planned limits, such that it could be   |                            |
| 4  |                   |                      | repeated                                          |                            |
| 5  |                   |                      |                                                   |                            |
| 6  | Study records -   | <a href="#">#11a</a> | Describe the mechanism(s) that will be used       | 7, Study screening         |
| 7  | data management   |                      | to manage records and data throughout the         | 8-9, Data extraction       |
| 8  |                   |                      | review                                            |                            |
| 9  |                   |                      |                                                   |                            |
| 10 |                   |                      |                                                   |                            |
| 11 | Study records -   | <a href="#">#11b</a> | State the process that will be used for           | 7, Study screening         |
| 12 | selection process |                      | selecting studies (such as two independent        |                            |
| 13 |                   |                      | reviewers) through each phase of the review       |                            |
| 14 |                   |                      | (that is, screening, eligibility and inclusion in |                            |
| 15 |                   |                      | meta-analysis)                                    |                            |
| 16 |                   |                      |                                                   |                            |
| 17 |                   |                      |                                                   |                            |
| 18 |                   |                      |                                                   |                            |
| 19 | Study records -   | <a href="#">#11c</a> | Describe planned method of extracting data        | 8-9, Data extraction       |
| 20 | data collection   |                      | from reports (such as piloting forms, done        |                            |
| 21 | process           |                      | independently, in duplicate), any processes       |                            |
| 22 |                   |                      | for obtaining and confirming data from            |                            |
| 23 |                   |                      | investigators                                     |                            |
| 24 |                   |                      |                                                   |                            |
| 25 |                   |                      |                                                   |                            |
| 26 |                   |                      |                                                   |                            |
| 27 |                   |                      |                                                   |                            |
| 28 |                   |                      |                                                   |                            |
| 29 |                   |                      |                                                   |                            |
| 30 |                   |                      |                                                   |                            |
| 31 | Data items        | <a href="#">#12</a>  | List and define all variables for which data      | 7, Interventions           |
| 32 |                   |                      | will be sought (such as PICO items, funding       | 7, Main outcome –          |
| 33 |                   |                      | sources), any pre-planned data assumptions        | Timing                     |
| 34 |                   |                      | and simplifications                               | 8-9, Data extraction       |
| 35 |                   |                      |                                                   |                            |
| 36 |                   |                      |                                                   |                            |
| 37 |                   |                      |                                                   |                            |
| 38 |                   |                      |                                                   |                            |
| 39 |                   |                      |                                                   |                            |
| 40 |                   |                      |                                                   |                            |
| 41 |                   |                      |                                                   |                            |
| 42 |                   |                      |                                                   |                            |
| 43 | Outcomes and      | <a href="#">#13</a>  | List and define all outcomes for which data       | 7, Main outcome (3,        |
| 44 | prioritization    |                      | will be sought, including prioritization of main  | rationale in Introduction) |
| 45 |                   |                      | and additional outcomes, with rationale           |                            |
| 46 |                   |                      |                                                   |                            |
| 47 |                   |                      |                                                   |                            |
| 48 |                   |                      |                                                   |                            |
| 49 |                   |                      |                                                   |                            |
| 50 |                   |                      |                                                   |                            |
| 51 |                   |                      |                                                   |                            |
| 52 |                   |                      |                                                   |                            |
| 53 |                   |                      |                                                   |                            |
| 54 |                   |                      |                                                   |                            |
| 55 |                   |                      |                                                   |                            |
| 56 |                   |                      |                                                   |                            |
| 57 |                   |                      |                                                   |                            |
| 58 |                   |                      |                                                   |                            |
| 59 |                   |                      |                                                   |                            |
| 60 |                   |                      |                                                   |                            |

|                                                                                  |                                    |                      |                                                                                                                                                                                                                                                           |                                            |
|----------------------------------------------------------------------------------|------------------------------------|----------------------|-----------------------------------------------------------------------------------------------------------------------------------------------------------------------------------------------------------------------------------------------------------|--------------------------------------------|
| 1<br>2<br>3<br>4<br>5<br>6<br>7<br>8<br>9<br>10<br>11<br>12                      | Risk of bias in individual studies | <a href="#">#14</a>  | Describe anticipated methods for assessing risk of bias of individual studies, including whether this will be done at the outcome or study level, or both; state how this information will be used in data synthesis                                      | 8, Risk of bias assessment                 |
| 13<br>14<br>15<br>16<br>17<br>18                                                 | Data synthesis                     | <a href="#">#15a</a> | Describe criteria under which study data will be quantitatively synthesised                                                                                                                                                                               | 9, Strategy for data synthesis             |
| 19<br>20<br>21<br>22<br>23<br>24<br>25<br>26<br>27<br>28<br>29<br>30<br>31<br>32 | Data synthesis                     | <a href="#">#15b</a> | If data are appropriate for quantitative synthesis, describe planned summary measures, methods of handling data and methods of combining data from studies, including any planned exploration of consistency (such as I <sup>2</sup> , Kendall's $\tau$ ) | 9, Strategy for data synthesis             |
| 33<br>34<br>35<br>36<br>37<br>38<br>39<br>40                                     | Data synthesis                     | <a href="#">#15c</a> | Describe any proposed additional analyses (such as sensitivity or subgroup analyses, meta-regression)                                                                                                                                                     | 9, Analysis of subgroups                   |
| 41<br>42<br>43<br>44<br>45                                                       | Data synthesis                     | <a href="#">#15d</a> | If quantitative synthesis is not appropriate, describe the type of summary planned                                                                                                                                                                        | n/a – quantitative synthesis is applicable |
| 46<br>47<br>48<br>49<br>50<br>51<br>52<br>53                                     | Meta-bias(es)                      | <a href="#">#16</a>  | Specify any planned assessment of meta-bias(es) (such as publication bias across studies, selective reporting within studies)                                                                                                                             | 8, Risk of bias assessment                 |
| 54<br>55<br>56<br>57<br>58<br>59<br>60                                           | Confidence in cumulative           | <a href="#">#17</a>  | Describe how the strength of the body of evidence will be assessed (such as GRADE)                                                                                                                                                                        | 8, Risk of bias assessment                 |

1 evidence

2  
3 None The PRISMA-P checklist is distributed under the terms of the Creative Commons Attribution  
4 License CC-BY 4.0. This checklist can be completed online using <https://www.goodreports.org/>, a tool  
5  
6 made by the [EQUATOR Network](#) in collaboration with [Penelope.ai](#)  
7  
8  
9  
10  
11  
12  
13  
14  
15  
16  
17  
18  
19  
20  
21  
22  
23  
24  
25  
26  
27  
28  
29  
30  
31  
32  
33  
34  
35  
36  
37  
38  
39  
40  
41  
42  
43  
44  
45  
46  
47  
48  
49  
50  
51  
52  
53  
54  
55  
56  
57  
58  
59  
60

For peer review only

# BMJ Open

## Quality of life measured by EQ-5D at different treatment time points for coronary artery disease: Protocol for a systematic review and meta-analysis

|                                 |                                                                                                                                                                                                                                                                                                                                                                                                                                                                                                                                         |
|---------------------------------|-----------------------------------------------------------------------------------------------------------------------------------------------------------------------------------------------------------------------------------------------------------------------------------------------------------------------------------------------------------------------------------------------------------------------------------------------------------------------------------------------------------------------------------------|
| Journal:                        | <i>BMJ Open</i>                                                                                                                                                                                                                                                                                                                                                                                                                                                                                                                         |
| Manuscript ID                   | bmjopen-2020-039311.R1                                                                                                                                                                                                                                                                                                                                                                                                                                                                                                                  |
| Article Type:                   | Protocol                                                                                                                                                                                                                                                                                                                                                                                                                                                                                                                                |
| Date Submitted by the Author:   | 24-Jun-2020                                                                                                                                                                                                                                                                                                                                                                                                                                                                                                                             |
| Complete List of Authors:       | Lum, Elaine; Duke-NUS Medical School, Health Services & Systems Research; Queensland University of Technology, School of Clinical Sciences<br>McCreanor, Victoria; Metro North Hospital and Health Service, Jamieson Trauma Institute, Royal Brisbane and Women's Hospital; Queensland University of Technology, Australian Centre for Health Services Innovation<br>Luo, Nan; National University of Singapore, Saw Swee Hock School of Public Health<br>Graves, Nicholas; Duke-NUS Medical School, Health Services & Systems Research |
| <b>Primary Subject Heading</b>: | Cardiovascular medicine                                                                                                                                                                                                                                                                                                                                                                                                                                                                                                                 |
| Secondary Subject Heading:      | Health economics, Health services research                                                                                                                                                                                                                                                                                                                                                                                                                                                                                              |
| Keywords:                       | Coronary heart disease < CARDIOLOGY, Quality in health care < HEALTH SERVICES ADMINISTRATION & MANAGEMENT, HEALTH ECONOMICS                                                                                                                                                                                                                                                                                                                                                                                                             |
|                                 |                                                                                                                                                                                                                                                                                                                                                                                                                                                                                                                                         |

SCHOLARONE™  
Manuscripts



I, the Submitting Author has the right to grant and does grant on behalf of all authors of the Work (as defined in the below author licence), an exclusive licence and/or a non-exclusive licence for contributions from authors who are: i) UK Crown employees; ii) where BMJ has agreed a CC-BY licence shall apply, and/or iii) in accordance with the terms applicable for US Federal Government officers or employees acting as part of their official duties; on a worldwide, perpetual, irrevocable, royalty-free basis to BMJ Publishing Group Ltd ("BMJ") its licensees and where the relevant Journal is co-owned by BMJ to the co-owners of the Journal, to publish the Work in this journal and any other BMJ products and to exploit all rights, as set out in our [licence](#).

The Submitting Author accepts and understands that any supply made under these terms is made by BMJ to the Submitting Author unless you are acting as an employee on behalf of your employer or a postgraduate student of an affiliated institution which is paying any applicable article publishing charge ("APC") for Open Access articles. Where the Submitting Author wishes to make the Work available on an Open Access basis (and intends to pay the relevant APC), the terms of reuse of such Open Access shall be governed by a Creative Commons licence – details of these licences and which [Creative Commons](#) licence will apply to this Work are set out in our licence referred to above.

Other than as permitted in any relevant BMJ Author's Self Archiving Policies, I confirm this Work has not been accepted for publication elsewhere, is not being considered for publication elsewhere and does not duplicate material already published. I confirm all authors consent to publication of this Work and authorise the granting of this licence.

1  
2  
3 1 Title page  
4

5 2 Quality of life measured by EQ-5D at different treatment time points  
6  
7 3 for coronary artery disease: Protocol for a systematic review and  
8  
9 4 meta-analysis  
10

11 5 Elaine Lum<sup>1,2</sup>, Victoria McCreanor<sup>3,4</sup>, Nan Luo<sup>5</sup>, Nicholas Graves<sup>1</sup>  
12

- 13 6 1. Health Services & Systems Research, Duke-NUS Medical School, Singapore.  
14  
15 7 2. School of Clinical Sciences, Queensland University of Technology, Brisbane, Australia.  
16  
17 8 3. Jamieson Trauma Institute, Metro North Hospital & Health Service – Royal Brisbane and  
18 9 Women’s Hospital, Brisbane, Australia.  
19  
20 10 4. Australian Centre for Health Services Innovation, Queensland University of Technology,  
21 11 Brisbane, Australia.  
22  
23 12 5. Saw Swee Hock School of Public Health, National University of Singapore, Singapore.  
24  
25

26 14 Elaine Lum

27 15 Email: [elaine\\_lum@duke-nus.edu.sg](mailto:elaine_lum@duke-nus.edu.sg)

28 16 ORCID: 0000-0002-0853-3018  
29  
30

31 18 Victoria McCreanor

32 19 Email: [victoria.mccreanor@qut.edu.au](mailto:victoria.mccreanor@qut.edu.au)

33 20 ORCID: 0000-0002-0589-8521  
34  
35

36 22 Nan Luo

37 23 Email: [ephln@nus.edu.sg](mailto:ephln@nus.edu.sg)

38 24 ORCID: 0000-0001-7980-6979  
39  
40

41 26 Nicholas Graves

42 27 Email: [n.graves@duke-nus.edu.sg](mailto:n.graves@duke-nus.edu.sg)

43 28 ORCID: 0000-0002-5559-3267  
44  
45  
46

47 30 **Corresponding Author**

48 31 Elaine Lum

49 32 Health Services & Systems Research

50 33 Duke-NUS Medical School

51 34 8 College Road, Singapore 169857

52 35 Email: [elaine\\_lum@duke-nus.edu.sg](mailto:elaine_lum@duke-nus.edu.sg)  
53  
54  
55

56 36  
57 37 Word count: 2885  
58  
59  
60



**ABSTRACT****Introduction**

Cardiovascular disease is estimated to affect 423 million people globally. It caused 18 million deaths in 2017 and is projected to cost USD\$1 trillion by 2030 worldwide. Coronary artery disease (CAD) is the most common type of cardiovascular disease; CAD treatments can affect patients' quality of life. Valuations of quality of life or health utilities are important for economic evaluations to ascertain relative health benefit when comparing treatments, and can be expected to change for individuals over time. The purpose of this systematic review is to estimate the quality of life of CAD patients reported through the EuroQol EQ-5D questionnaire, from short to longer-term time points following different treatments.

**Methods and analysis**

PubMed, Embase, Web of Science, the Cochrane Database of Systematic Reviews, and the EuroQol website will be systematically searched from January 2003 to March 2020. Published, peer-reviewed, English language studies assessing quality of life of CAD patients using the EQ-5D will be included. One researcher will conduct the search; two researchers will independently screen titles and abstracts for potential inclusion. Full texts of potentially eligible studies will be retrieved for a second round of independent screening against inclusion and exclusion criteria by two researchers. The final list of included studies will be assessed for risk of bias using the Rob 2 and ROBINS-I tools for randomized and non-randomized studies, respectively. Data extraction will be done by one researcher, with data extraction for a random 10% of included studies checked by a second researcher. Mean utility weights for individual studies will be combined using random effects model meta-analyses. A model will be run separately for each time point and treatment. Treatment time points of interest include baseline, 30 days, 6 months, 12-24 months, and more than 24 months. Subgroup analysis of patients with diabetes who received interventional treatments — coronary artery bypass graft or percutaneous coronary intervention with or without stents, will be conducted for the same selected time points.

**Ethics and dissemination:** Ethics approval is not required for systematic reviews. Results of the review will be disseminated via publication in a peer-reviewed journal.

**PROSPERO registration number:** Pending

**Key words:**

Coronary artery disease; quality of life; EQ-5D; coronary artery bypass graft; percutaneous coronary intervention.

78 **ARTICLE SUMMARY****Strengths and limitations of this study**

- The search strategy is designed to be comprehensive and aligned with the Peer Review of Electronic Search Strategies (PRESS) guidelines.
- We will use PubMed as one of the databases instead of Medline to capture articles not yet indexed with MeSH terms and those released ahead of print.
- A final search will be run just before data synthesis begins to find any new articles that should be included in the analysis, since the search.
- The systematic review protocol was developed based on the Preferred Reporting Items for Systematic Reviews and Meta-Analyses for Protocols (PRISMA-P) guidelines.
- Inclusion of studies that are available as full text and in English only may lead to language bias.

79

80 **INTRODUCTION**

81 Cardiovascular disease affects 423 million people globally(1) and causes 31% of deaths annually with  
 82 18 million deaths in 2017.(2) Cardiovascular disease is projected to cost USD\$1 trillion by 2030 in  
 83 direct healthcare costs, lost productivity due to disability or premature death, and time lost from  
 84 work.(3) Coronary artery disease (CAD) is the most common type of cardiovascular disease.(4)  
 85 Patients with CAD are treated with long-term medications, lifestyle modifications, and/or  
 86 interventional procedures.(5) Commonly used interventional procedures include coronary artery  
 87 bypass graft (CABG) and percutaneous coronary intervention (PCI) with or without stents.(5)

88 Individuals living with CAD experience changes in their quality of life.(6-9) CAD treatments can affect  
 89 quality of life in either a positive or negative direction; and this can be expected to change over a  
 90 period of time, particularly in the immediate vs. longer-term period post-CABG or PCI.(6, 7) Quality  
 91 of life estimates as measured by health utilities are important for economic evaluations to  
 92 determine relative health benefit when comparing treatments.(10) Health utilities are the numerical  
 93 value reflecting the strength of an individual's preference for specific health-related outcomes,  
 94 where 0 represents death and 1 represents full health.(10) Together with length of life, health  
 95 utilities are used to calculate quality-adjusted life years (QALYs).(10) QALYs are used in cost-  
 96 effectiveness studies to enable direct comparisons between treatment options.(10)

97 For chronic illnesses such as coronary artery disease, health utilities over time are particularly  
 98 important so as not to bias estimates of cost-effectiveness toward treatments that show early but  
 99 unsustained health benefits, and against those which may only show health benefits in the longer-  
 100 term.(6) However, health utilities over various time points can be logistically challenging and  
 101 expensive to collect; and estimates need to be as robust as possible given their use in informing  
 102 medical decision-making and health-related policies. Hence, to reduce research waste and to  
 103 increase the robustness of utility estimates, systematic reviews and meta-analyses of health utilities  
 104 from single studies are conducted.

105 Previous reviews and meta-analyses of health utilities in cardiovascular diseases focussed on either  
 106 summarising preference weights of various health-related quality of life instruments(11) or in

1  
2  
3 107 synthesising the evidence on the validity and reliability of the EQ-5D.(12) Although the 2010 review  
4 108 by Dyer et al. summarised utility scores of the EQ-5D,(12) a number of important studies such as the  
5 109 ORBITA trial have since been published.(13) We will focus on studies that used the EQ-5D to  
6 110 measure health-related quality of life, as it is the most widely used generic preference-based  
7 111 instrument.(14) The EQ-5D is also the preferred instrument for Health Technology Assessments by  
8 112 the UK National Institute for Health and Care Excellence (NICE), and the Zorginstituut Nederland  
9 113 (ZIN).(14, 15)

12 114 The aim of this study is to estimate the quality of life of people with CAD quantified by the EQ-5D at  
13 115 selected time points (short-, mid- and longer-term) following the initiation of different treatments.  
14 116 Definitions of terms used are in Box 1.  
15  
16

17 117

#### Box 1. Definitions

- Coronary artery disease: Any one of the following conditions — coronary atherosclerosis, angina, ischaemia and no obstructive coronary artery disease (INOCA); acute coronary syndromes i.e. unstable angina, myocardial infarction (STEMI or NSTEMI), myocardial infarction and no obstructive coronary artery disease (MINOCA); silent ischaemia.
- Optimal medical therapy: A combination of evidence-based treatments recommended by clinical guidelines e.g. medications (pharmacological) to treat disease progression and symptoms, along with lifestyle modifications (non-pharmacological).
- Interventional procedures: Coronary artery bypass graft (CABG), percutaneous coronary intervention (PCI) with — bare metal stent (PCI-BMS), drug-eluting stent (PCI-DES), absorbable stent (PCI-AS) or without stents (balloon angioplasty), carried out in addition to optimal medical therapy.
- Tariff: Preference weight which reflects the preference on different health states of a particular population.

18  
19  
20  
21  
22  
23  
24  
25  
26  
27  
28  
29  
30  
31  
32  
33  
34  
35  
36  
37  
38 118

## 39 119 METHODS AND ANALYSIS

### 40 120 Study design

41  
42  
43 121 The study protocol has been developed based on the Preferred Reporting Items for Systematic  
44 122 Reviews and Meta-Analyses for Protocols (PRISMA-P) guidelines.(16)  
45  
46

47 123

### 48 124 Search strategy

#### 49 125 Databases

50  
51  
52 126 The following databases and sources will be searched: PubMed, Embase (Ovid), Web of Science, the  
53 127 Cochrane Database of Systematic Reviews, and the EuroQol website.  
54

55 128 A previous study demonstrated that to optimize the search when conducting systematic reviews, the  
56 129 following four electronic databases should be searched as a minimum: Medline, Embase, Web of  
57 130 Science, and Google Scholar.(17) We selected PubMed as it has a larger repository than Medline,  
58 131 including additional life sciences journals, citations that are “ahead of print” and those not yet  
59 132 indexed with MeSH terms.(18) We did not select Google Scholar as the search may not be replicable.

### 133 *Timeframe*

134 The search will encompass the following period: 1 January 2003 to the date of the first search in  
135 2020. Where the search functions of particular databases do not allow day/month/year to be  
136 specified, we will use the month and year e.g. January 2003 to March 2020.

137 The lower date limit of January 2003 was selected as the first commercially available drug-eluting  
138 stent was approved by the US Food and Drug Administration in that year.<sup>(19)</sup> The upper date limit  
139 will be the date of the first search conducted (within the second search in the three-step strategy  
140 below); and will subsequently be used as the upper date limit when searching the remaining  
141 databases. This strategy ensures that the date range for searches is consistent across all databases.

### 142 *Search strategy*

143 The search aims to find both published and “ahead of print” publications. A three-step strategy will  
144 be used.

- 145 1. First search (EL): Initial search limited to PubMed only, followed by analysis of text words in  
146 the (a) titles and abstracts of retrieved papers (keywords); and (b) index terms used to  
147 describe the articles (metadata, tags). Keywords for the initial search: coronary artery  
148 disease; EQ-5D; EQ-5D-3L; EQ-5D-5L; EuroQol; treatment. Output: The search string for the  
149 systematic review will be constructed (see Supplementary File).
- 150 2. Second search (EL): PubMed, Embase (Ovid), Web of Science, the Cochrane Database of  
151 Systematic Reviews, and the EuroQol website will then be searched using the search string  
152 constructed from the previous step. The yield from this step will be subjected to title and  
153 abstract screening for potential inclusion (first screening), followed by retrieval of full text  
154 articles, and screening of full text articles for inclusion (second screening).
- 155 3. Third search (EL): The reference list of included articles will be manually examined to identify  
156 additional studies for inclusion in the systematic review.

157 Finally, as per good practice, searches will be re-run just before data synthesis to identify any  
158 new studies that should be retrieved for inclusion.

159

### 160 **Types of studies to be included**

161 All types of studies will be included so long as inclusion criteria are met. Systematic reviews  
162 identified from the search will be examined for relevant studies for inclusion.

163

### 164 *Inclusion criteria*

- 165 • Studies which report on quality of life post-treatment for coronary artery disease —  
166 coronary atherosclerosis, angina, ischaemia and no obstructive coronary artery disease  
167 (INOCA); acute coronary syndromes i.e. unstable angina, myocardial infarction (STEMI or  
168 NSTEMI), myocardial infarction and no obstructive coronary artery disease (MINOCA); silent  
169 ischaemia

1  
2  
3  
4  
5  
6  
7  
8  
9  
10  
11  
12  
13  
14  
15  
16  
17  
18  
19  
20  
21  
22  
23  
24  
25  
26  
27  
28  
29  
30  
31  
32  
33  
34  
35  
36  
37  
38  
39  
40  
41  
42  
43  
44  
45  
46  
47  
48  
49  
50  
51  
52  
53  
54  
55  
56  
57  
58  
59  
60

170 • Treatments may be pharmacological, non-pharmacological (e.g. lifestyle modifications), or  
171 interventional procedures (e.g. coronary artery bypass graft, percutaneous coronary  
172 intervention with or without stents)

173 • Preference based utility values for quality of life using EQ-5D

174 • Studies reported in English

175

176 *Exclusion criteria*

177 • Editorials, letters, and conference proceedings

178 • Study protocols or studies-in-progress e.g. clinical trial registrations

179 • Studies which reported only EQ-5D Visual Analogue Scale outcomes

180 • Studies which reported EQ-5D values derived from mapping other measures of health  
181 outcomes

182 • Studies which reported quality of life from other studies, without contributing new data

183 • Studies which reported on subgroups of a previously reported dataset

184 • Specific patient groups known to have highly impaired quality of life (to avoid skewing  
185 estimates) e.g. studies examining coronary artery disease in people with depression

186 • For post-treatment estimates, treatment was not specified e.g. did not report the type of  
187 stent used

188 • Studies on enhanced external counter pulsation (EECP) therapy

189 • Full text article not available

190

191 **Condition or domain being studied**

192 Quality of life (health utilities) at various treatment time points for coronary artery disease.

193

194 **Participants/population**

195 Inclusion: Adults (18 years old and above) diagnosed with coronary artery disease using criteria such  
196 as the International Classification of Diseases and Related Health Problems (ICD-10).

197 Exclusion: People under 18 years old. Highly specific patient groups e.g. studies examining coronary  
198 artery disease in people with depression

199

200 **Interventions**

201 Pharmacological, non-pharmacological, and interventional procedures.

202 Pharmacological interventions are medications used to manage or treat coronary artery disease  
203 and/or prevent secondary cardiovascular events, and may include cholesterol-modifying  
204 medications (e.g. statins, ezetimibe and PCSK9 inhibitors), antiplatelets, beta blockers, calcium

205 channel blockers, ranolazine, nitrates, angiotensin-converting enzyme (ACE) inhibitors, angiotensin II  
206 receptor blockers (ARB).

207 Non-pharmacological interventions include lifestyle modifications such as smoking cessation,  
208 choosing healthy foods, engaging in regular physical activity/exercise, removing excess weight, and  
209 reducing stress.

210 Interventional procedures: Coronary artery bypass graft (CABG) or percutaneous coronary  
211 intervention (PCI) with or without stents (e.g. balloon angioplasty). Stents used in PCI may be bare  
212 metal stents, drug-eluting stents, absorbable stents, or absorbable drug-eluting stents. Implantable  
213 cardioverter defibrillators (ICD) will not be included.

214

### 215 **Comparator/ Control**

216 The review will compare health utilities reported from patients receiving the treatments listed above  
217 at selected treatment time points.

218

### 219 **Context**

220 Any setting — inpatient, outpatient, community.

221

### 222 **Main outcome**

223 Quality of life health utilities i.e. EQ-5D-3L and EQ-5D-5L at selected treatment time points.

### 224 *Timing and effect measures*

225 Baseline, 30 days, 6 months (short term), 12-24 months (mid-term), more than 24 months (long  
226 term).

227

### 228 **Study screening**

229 Yields from searches will be exported into the reference manager software EndNote x9  
230 ([www.endnote.com](http://www.endnote.com)). Duplicates will be removed. Two copies of the EndNote library will be made for  
231 two researchers (EL, VM) to independently screen study titles and abstracts against inclusion and  
232 exclusion criteria. Any discrepancies will be resolved via discussion; a third researcher (NG) will  
233 moderate if consensus is not reached.

234 Full text records of the included papers from the first round of screening are then retrieved. Studies  
235 will be excluded if full text is not available at this stage or not in English.

236 Next, all full text records retrieved will be independently assessed against the same inclusion and  
237 exclusion criteria by two researchers (EL, VM). Reasons for exclusion will be documented. Any  
238 discrepancies will be resolved via discussion; a third researcher (NG) will moderate if consensus is  
239 not reached. Study selection will be illustrated as a PRISMA flow diagram.

240

241

## 242 Risk of bias (quality) assessment

243 For included studies, we will use the RoB 2 tool to assess risk of bias at the study level in randomised  
244 trials and the ROBINS-I tool for non-randomised studies.(20, 21) The RoB 2 tool prompts judgements  
245 regarding biases in five domains: bias arising from the randomisation process, those due to  
246 derivations from intended interventions, missing outcome data, measurement of the outcome, and  
247 selection of the reported result.(20) The ROBINS-I tool covers seven domains: bias due to  
248 confounding, participant selection, classification of interventions, deviations from intended  
249 interventions, missing data, measurement of outcomes, and selection of the reported results.(21)

250 One researcher (EL) will complete the risk of bias/quality appraisal; a second researcher (VM) will  
251 check the assessment for ten percent of the included studies. Any discrepancies will be resolved via  
252 discussion; a third researcher (NG) will moderate if consensus is not reached. All studies will be  
253 included in the data synthesis; in addition, studies with low risk of bias will also be analysed  
254 separately. The risk of bias assessment for all included studies will be reported in a table format  
255 showing the overall judgment for each study (Rob 2: low/ high/ some concerns; ROBINS-I: low/  
256 moderate/ serious/ critical).

257

## 258 Data extraction

259 Data extraction will be conducted on all studies that are included. We will take the following  
260 approaches to data extraction to ensure published estimates are not counted more than once.

- 261 • Where there are multiple analyses for the same dataset, we will use only one estimate per  
262 subgroup per time point
- 263 • We will use the broadest grouping available for each dataset. For example, if a study reports  
264 on all patients with bypass surgery and another reports on subgroups of patients with  
265 bypass surgery by their obesity status from the same dataset, we will include only the overall  
266 bypass surgery utility weights, not the obesity subgroups
- 267 • Where a paper provides updated findings (e.g. for a later time point) from a previous  
268 published study of the same quality of life data collection, we will only include data for the  
269 later time point from the updated analysis

270 For baseline or time zero utility measurements, we will note when the EQ-5D questionnaire was  
271 given to patients.

272 For each included study, the following data will be extracted:

- 273 • Authors
- 274 • Publication date
- 275 • Country/countries where study was done
- 276 • Baseline presentation of patients
- 277 • Treatment received e.g. coronary artery bypass graft, percutaneous coronary intervention  
278 and type of stent used
- 279 • Survey instrument (e.g. EQ-5D, EQ-5D-3L, EQ-5D-5L)
- 280 • Location of participants (e.g. hospital – inpatient, hospital – outpatient, home)
- 281 • Administration mode of survey (e.g. interviewer, self-completion)

- 282 • Respondent identity (e.g. self, proxy)
- 283 • Language of survey
- 284 • Tariff (preference weights) used to generate utility weights from the EQ-5D results
- 285 • Mean utility weights reported for each treatment and time point combination
- 286 • Standard error or relevant statistics to enable calculation of the standard error i.e. standard deviation and sample size
- 287
- 288 • Number of participants in the group, mean age, percentage of men and women in the group
- 289 • Percentage of participants with diabetes
- 290 • Percentage of participants who currently smoke tobacco

291 Data extraction will be piloted by one researcher (EL) with five studies randomly selected from the  
292 included papers. A second researcher (VM) will check the pilot data extraction. Discrepancies will be  
293 resolved via discussion. A third researcher (NG) will moderate if discrepancies are not resolved.  
294 Subsequently, one researcher will complete data extraction of the remaining studies (EL). A second  
295 researcher will check the data extracted for a random ten percent of included papers (VM). Similarly,  
296 discrepancies will be resolved via discussion; a third researcher (NG) will moderate if any  
297 discrepancies are unresolved.

298 An Excel spreadsheet will be set up for data extraction.

299

### 300 **Strategy for data synthesis**

301 Mean utility weights for individual studies will be combined using random effects model meta-  
302 analyses. We will use the R package, metafor,(22) to do this. A model will be run separately for each  
303 time point and treatment.

304 For utility weights following interventional treatments, we will include all studies related to that  
305 particular treatment. Each type of interventional procedure will be analysed separately e.g. CABG,  
306 PCI without stent (balloon angioplasty), PCI with bare metal stent (PCI-BMS), PCI with drug-eluting  
307 stent (PCI-DES), PCI with absorbable stent (PCI-AS).

308 For re-hospitalisations for acute coronary artery disease, we will use estimates only from studies  
309 related to acute presentations. For other re-hospitalisations we will use estimates only from studies  
310 not related to acute presentations.

311

### 312 **Analysis of subgroups or subsets**

313 Subgroup analysis of patients with diabetes who received CABG, balloon angioplasty, PCI-BMS, PCI-  
314 DES, PCI-AS (if any) will be conducted for the same selected time points regarding the EuroQoL EQ-  
315 5D. Previous studies have demonstrated increased morbidity and/or mortality among people with  
316 diabetes who received coronary revascularisation procedures compared to those without  
317 diabetes.(23, 24) Hence, the utility value of the quality of life may differ between patients with  
318 diabetes and those without.

319 We will also conduct subgroup analysis of patients with acute coronary syndromes (ACS) vs stable  
320 CAD /stable coronary syndromes (SCS). ACS includes unstable angina, NSTEMI, STEMI, myocardial



1  
2  
3 321 infarction with no obstructive coronary artery disease (MINOCA); and stable CAD includes  
4 322 obstructive CAD and ischaemia with no obstructive coronary artery disease (INOCA).(25)  
5  
6 323  
7

8 324 **Type and method of review**

9  
10 325 Systematic review, Meta-analysis.  
11  
12 326

13 327 **Anticipated or actual start date**

14  
15 328 27 February 2020.  
16  
17 329

18  
19 330 **Anticipated completion date**

20 331 31 August 2020.  
21  
22 332

23  
24 333 **Patient and public involvement**

25  
26 334 No patient or public involvement.  
27  
28 335

29 336 **Ethics and dissemination**

30  
31 337 Ethical approval is not required for systematic review protocols. Results of the review will be  
32 338 disseminated via publication in a peer-reviewed journal. In addition, should the findings of the  
33 339 review warrant a re-examination of current clinical practice, a brief will be prepared and sent to  
34 340 relevant lead agencies in Australia and Singapore e.g. Ministry of Health (Singapore), Department of  
35 341 Health (Australia), Deeble Institute (Australia).  
36  
37 342

38  
39  
40 343 **Data deposition and curation**

41 344 Data extraction tables will be deposited in an open data repository such as the Open Science  
42 345 Framework (<https://osf.io/>).  
43  
44 346

45  
46 347 **Amendments**

47  
48 348 All amendments to the protocol will be dated, described, accompanied by a rationale, and  
49 349 documented in PROSPERO post-registration.  
50  
51 350

52  
53 351 **DISCUSSION**

54  
55 352 To date, there is only one systematic review of patient reported quality of life focussed on EQ-5D  
56 353 which was published in 2010 by Dyer et al.(12) Given that important clinical studies in the  
57 354 cardiovascular field have since been published, another review is timely.  
58  
59  
60

Our findings will be useful for economic evaluations to determine relative health benefit when comparing treatments. Knowing the health utilities at various treatment time points following different CAD treatments will facilitate cost-effective policy-making, inform clinical guidelines and practice changes. This study will also be useful to other researchers and decision-makers who wish to work on cost-effectiveness analyses for cardiology. In Singapore where this study is being undertaken, the health utilities estimated by this study will add value to the national longitudinal database of cardiology patients — SingCLOUD,(26) and other disease registries here and elsewhere that have not collected EQ-5D data.

Limitations are that non-English language articles and studies that use other health-related quality of life instruments will be excluded. We chose to focus on EQ-5D generated health utilities as it is the most widely used generic preference-based measure due to its robustness, reliability, and responsiveness across many health conditions and countries.(14) Health utilities derived from different instruments are not interchangeable with the EQ-5D and there are no straightforward methods for translation.(27)

369

#### 370 **AUTHOR CONTRIBUTIONS**

The systematic review was conceptualised by all authors. EL drafted the protocol, which was critically reviewed by VM, NL and NG. All protocol authors read, provided feedback, and approved the final manuscript. Database searches will be completed by EL; articles will be screened for inclusion and exclusion by EL and VM; data extraction will be led by EL. Data analyses will be done by EL and VM, and reviewed by NL and NG. The guarantor of the review is NG.

376

#### 377 **FUNDING STATEMENT**

This research received no specific grant from any funding agency in the public, commercial or not-for-profit sectors.

380

#### 381 **COMPETING INTERESTS STATEMENT**

No competing interests to declare.

383

#### 384 **REFERENCES**

- 385 1. Roth GA, Johnson C, Abajobir A, Abd-Allah F, Abera SF, Abyu G, et al. Global, Regional, and  
386 National Burden of Cardiovascular Diseases for 10 Causes, 1990 to 2015. *J Am Coll Cardiol.*  
387 2017;70(1):1-25.
- 388 2. Mensah GA, Roth GA, Fuster V. The Global Burden of Cardiovascular Diseases and  
389 Risk Factors. *J Am Coll Cardiol.* 2019;74(20):2529.
- 390 3. Bloom D, Cafiero E, Jane-Llopis E, Abrahams-Gessel S, Bloom L, Fathima S, et al. The Global  
391 Economic Burden of Non-communicable Diseases. Geneva: World Economic Forum; 2011.
- 392 4. Centers for Disease Control and Prevention. Heart Disease Facts 2019 [cited 2020 March 26].  
393 Available from: <https://www.cdc.gov/heartdisease/facts.htm>.
- 394 5. NIH National Heart Lung and Blood Institute. Coronary Heart Disease 2020 [cited 2020  
395 March 26]. Available from: <https://www.nhlbi.nih.gov/health-topics/coronary-heart-disease>.

- 396 6. Sajobi Tolulope T, Wang M, Awosoga O, Santana M, Southern D, Liang Z, et al. Trajectories of  
397 Health-Related Quality of Life in Coronary Artery Disease. *Circulation: Cardiovascular Quality and*  
398 *Outcomes*. 2018;11(3):e003661.
- 399 7. Yang L-X, Zhou Y-J, Wang Z-J, Li Y-P, Chai M. Impact of invasive treatment strategy on health-  
400 related quality of life six months after non-ST-elevation acute coronary syndrome. *J Geriatr Cardiol*.  
401 2014;11(3):206-11.
- 402 8. Sipötz J, Friedrich O, Höfer S, Benzer W, Chatsakos T, Gaul G, et al. Health related quality of  
403 life and mental distress after PCI: restoring a state of equilibrium. *Health Qual Life Outcomes*.  
404 2013;11:144-.
- 405 9. Gencer B, Girardin F. Coronary artery disease is associated with persistent lower quality of  
406 life in women. *Open Heart*. 2015;2(1):e000305.
- 407 10. Whitehead SJ, Ali S. Health outcomes in economic evaluation: the QALY and utilities. *British*  
408 *Medical Bulletin*. 2010;96(1):5-21.
- 409 11. Stevanović J, Pechlivanoglou P, Kampinga MA, Krabbe PFM, Postma MJ. Multivariate Meta-  
410 Analysis of Preference-Based Quality of Life Values in Coronary Heart Disease. *PLOS ONE*.  
411 2016;11(3):e0152030.
- 412 12. Dyer MTD, Goldsmith KA, Sharples LS, Buxton MJ. A review of health utilities using the EQ-  
413 5D in studies of cardiovascular disease. *Health Qual Life Outcomes*. 2010;8(1):13.
- 414 13. Al-Lamee R, Thompson D, Dehbi H-M, Sen S, Tang K, Davies J, et al. Percutaneous coronary  
415 intervention in stable angina (ORBITA): a double-blind, randomised controlled trial. *The Lancet*.  
416 2018;391(10115):31-40.
- 417 14. Brazier JE, Rowen D, Lloyd A, Karimi M. Future Directions in Valuing Benefits for Estimating  
418 QALYs: Is Time Up for the EQ-5D? *Value in Health*. 2019;22(1):62-8.
- 419 15. National Institute for Health and Care Excellence. Position statement on use of the EQ-5D-5L  
420 value set for England (updated October 2019) 2019 [cited 2020 Mar 31]. Available from:  
421 [https://www.nice.org.uk/about/what-we-do/our-programmes/nice-guidance/technology-appraisal-](https://www.nice.org.uk/about/what-we-do/our-programmes/nice-guidance/technology-appraisal-guidance/eq-5d-5l)  
422 [guidance/eq-5d-5l](https://www.nice.org.uk/about/what-we-do/our-programmes/nice-guidance/technology-appraisal-guidance/eq-5d-5l).
- 423 16. Shamseer L, Moher D, Clarke M, Gherzi D, Liberati A, Petticrew M, et al. Preferred reporting  
424 items for systematic review and meta-analysis protocols (PRISMA-P) 2015: elaboration and  
425 explanation. *BMJ : British Medical Journal*. 2015;349:g7647.
- 426 17. Bramer WM, Rethlefsen ML, Kleijnen J, Franco OH. Optimal database combinations for  
427 literature searches in systematic reviews: a prospective exploratory study. *Systematic Reviews*.  
428 2017;6(1):245.
- 429 18. NIH National Library of Medicine. MEDLINE, PubMed, and PMC (PubMed Central): How are  
430 they different? 2019 [Available from: <https://www.nlm.nih.gov/bsd/difference.html>].
- 431 19. Iqbal J, Gunn J, Serruys PW. Coronary stents: historical development, current status and  
432 future directions. *British Medical Bulletin*. 2013;106(1):193-211.
- 433 20. Sterne JAC, Savović J, Page MJ, Elbers RG, Blencowe NS, Boutron I, et al. RoB 2: a revised tool  
434 for assessing risk of bias in randomised trials. *BMJ*. 2019;366:l4898.
- 435 21. Sterne JAC, Hernán MA, Reeves BC, Savović J, Berkman ND, Viswanathan M, et al. ROBINS-I:  
436 a tool for assessing risk of bias in non-randomized studies of interventions. *BMJ*. 2016;355:i4919.
- 437 22. Viechtbauer W. Conducting meta-analyses in R with the metafor package. *Journal of*  
438 *Statistical Software*. 2010;36(3):1-48.
- 439 23. Armstrong EJ, Waltenberger J, Rogers JH. Percutaneous coronary intervention in patients  
440 with diabetes: current concepts and future directions. *J Diabetes Sci Technol*. 2014;8(3):581-9.
- 441 24. Kereiakes D. Percutaneous coronary intervention in diabetic patients - Improving outcomes  
442 through advances in catheter-based and adjunctive pharmacotherapeutic strategies. *Interventional*  
443 *Cardiology*. 2008;3(1):33-6.
- 444 25. Ford TJ, Corcoran D, Berry C. Stable coronary syndromes: pathophysiology, diagnostic  
445 advances and therapeutic need. *Heart*. 2018;104(4):284.

- 1  
2  
3 446 26. Yeo KK, Ong H-Y, Chua T, Lim ZJ, Yap J, Ho HH, et al. Building a Longitudinal National  
4 447 Integrated Cardiovascular Database — Lessons Learnt From SingCLOUD —. Circulation Reports.  
5 448 2020;2(1):33-43.  
6 449 27. Longworth L, Rowen D. Mapping to Obtain EQ-5D Utility Values for Use in NICE Health  
7 450 Technology Assessments. Value in Health. 2013;16(1):202-10.

9 451  
10  
11  
12  
13  
14  
15  
16  
17  
18  
19  
20  
21  
22  
23  
24  
25  
26  
27  
28  
29  
30  
31  
32  
33  
34  
35  
36  
37  
38  
39  
40  
41  
42  
43  
44  
45  
46  
47  
48  
49  
50  
51  
52  
53  
54  
55  
56  
57  
58  
59  
60

For peer review only

## Supplementary File. PubMed search strategy

|    |                                                                                                                                                                                                                                                                                                                                                                                                                                                                                                                                                                                                                                                                                     |
|----|-------------------------------------------------------------------------------------------------------------------------------------------------------------------------------------------------------------------------------------------------------------------------------------------------------------------------------------------------------------------------------------------------------------------------------------------------------------------------------------------------------------------------------------------------------------------------------------------------------------------------------------------------------------------------------------|
| #1 | ((((((((((((coronary artery disease) OR (coronary heart disease)) OR (coronary artery stenosis)) OR (cardiovascular disease)) OR (myocardial ischemia)) OR (myocardial infarction)) OR (acute coronary syndrome)) OR (angina)) OR (angina pectoris)) OR (chest pain)) OR (silent ischemia)) OR (myocardial ischemia[MeSH Terms]))                                                                                                                                                                                                                                                                                                                                                   |
| #2 | ((((((((((((EQ-5D) OR (EQ-5D-3L)) OR (EQ-5D-5L)) OR (EuroQOL)) OR (European Quality of Life - 5 Dimensions)) OR (European QOL - 5 Dimensions)) OR (EuroQOL five-dimensional questionnaire)) OR (EuroQOL 5D)) OR (Quality of life[MeSH Terms])) OR (Quality-adjusted life years[MeSH Terms])) OR (Cost-benefit analysis[MeSH Terms]))                                                                                                                                                                                                                                                                                                                                                |
| #3 | ((((((((((((((((((((((optimal medical treatment) OR (best medical therapy)) OR (coronary revascularization)) OR (myocardial revascularization)) OR (coronary angiography)) OR (coronary artery bypass graft)) OR (CABG)) OR (percutaneous coronary intervention)) OR (PCI)) OR (drug-eluting stent)) OR (Paclitaxel-eluting stent)) OR (Sirolimus-eluting stent)) OR (Everolimus-eluting stent)) OR (bare metal stent)) OR (angioplasty)) OR (myocardial ischemia/drug therapy[MeSH Terms])) OR (myocardial ischemia/surgery[MeSH Terms])) OR (myocardial revascularization[MeSH Terms])) OR (percutaneous coronary intervention[MeSH Terms])) OR (drug-eluting stent[MeSH Terms])) |
| #4 | ((#1) AND (#2)) AND (#3)                                                                                                                                                                                                                                                                                                                                                                                                                                                                                                                                                                                                                                                            |
| #5 | ((((#4) NOT (stroke[MeSH Terms])) NOT (peripheral arterial disease[MeSH Terms])) NOT (venous insufficiency[MeSH Terms])) NOT (atherectomy[MeSH Terms]))                                                                                                                                                                                                                                                                                                                                                                                                                                                                                                                             |
| #6 | ((((#5) NOT (editorial[Publication Type])) NOT (clinical conference[Publication Type])) NOT (letter[Publication Type]))                                                                                                                                                                                                                                                                                                                                                                                                                                                                                                                                                             |
| #7 | (#6) AND (English[Language])                                                                                                                                                                                                                                                                                                                                                                                                                                                                                                                                                                                                                                                        |
| #8 | (#7) AND (("2003/01/01"[Date - Entry] : "2020/03/09"[Date - Entry]))                                                                                                                                                                                                                                                                                                                                                                                                                                                                                                                                                                                                                |

# Reporting checklist for protocol of a systematic review.

Based on the PRISMA-P guidelines.

## Instructions to authors

Complete this checklist by entering the page numbers from your manuscript where readers will find each of the items listed below.

Your article may not currently address all the items on the checklist. Please modify your text to include the missing information. If you are certain that an item does not apply, please write "n/a" and provide a short explanation.

Upload your completed checklist as an extra file when you submit to a journal.

In your methods section, say that you used the PRISMA-P reporting guidelines, and cite them as:

Moher D, Shamseer L, Clarke M, Ghersi D, Liberati A, Petticrew M, Shekelle P, Stewart LA. Preferred Reporting Items for Systematic Review and Meta-Analysis Protocols (PRISMA-P) 2015 statement. Syst Rev. 2015;4(1):1.

|                | Reporting Item                                                                                         | Page Number        |
|----------------|--------------------------------------------------------------------------------------------------------|--------------------|
| <b>Title</b>   |                                                                                                        |                    |
| Identification | <a href="#">#1a</a> Identify the report as a protocol of a systematic review                           | 1, Title           |
| Update         | <a href="#">#1b</a> If the protocol is for an update of a previous systematic review, identify as such | n/a, not an update |

### Title

|                | Reporting Item                                                               | Page Number |
|----------------|------------------------------------------------------------------------------|-------------|
| Identification | <a href="#">#1a</a> Identify the report as a protocol of a systematic review | 1, Title    |

|        |                                                                                                        |                    |
|--------|--------------------------------------------------------------------------------------------------------|--------------------|
| Update | <a href="#">#1b</a> If the protocol is for an update of a previous systematic review, identify as such | n/a, not an update |
|--------|--------------------------------------------------------------------------------------------------------|--------------------|

1 **Registration**  
2  
3

4 [#2](#) If registered, provide the name of the registry 2, pending PROSPERO  
5  
6 (such as PROSPERO) and registration registration  
7  
8 number  
9  
10

11 **Authors**  
12  
13  
14

15 **Contact**

16 [#3a](#) Provide name, institutional affiliation, e-mail 1  
17 address of all protocol authors; provide  
18 physical mailing address of corresponding  
19 author  
20  
21  
22  
23  
24

25 **Contribution**

26 [#3b](#) Describe contributions of protocol authors 11, Author Contributions  
27 and identify the guarantor of the review  
28  
29

30 **Amendments**  
31  
32

33 [#4](#) If the protocol represents an amendment of 10, Amendments  
34 a previously completed or published  
35 protocol, identify as such and list changes;  
36 otherwise, state plan for documenting  
37 important protocol amendments  
38  
39  
40  
41  
42  
43  
44

45 **Support**  
46  
47

48 **Sources**

49 [#5a](#) Indicate sources of financial or other support 11, Funding Statement  
50 for the review  
51  
52  
53

54 **Sponsor**

55 [#5b](#) Provide name for the review funder and / or n/a, no funder or  
56 sponsor sponsor  
57  
58  
59

|    |                      |                     |                                                |                         |
|----|----------------------|---------------------|------------------------------------------------|-------------------------|
| 1  | Role of sponsor or   | <a href="#">#5c</a> | Describe roles of funder(s), sponsor(s), and / | n/a, no funder or       |
| 2  | funder               |                     | or institution(s), if any, in developing the   | sponsor                 |
| 3  |                      |                     | protocol                                       |                         |
| 4  |                      |                     |                                                |                         |
| 5  |                      |                     |                                                |                         |
| 6  |                      |                     |                                                |                         |
| 7  |                      |                     |                                                |                         |
| 8  |                      |                     |                                                |                         |
| 9  | <b>Introduction</b>  |                     |                                                |                         |
| 10 |                      |                     |                                                |                         |
| 11 |                      |                     |                                                |                         |
| 12 | Rationale            | <a href="#">#6</a>  | Describe the rationale for the review in the   | 3-4, Introduction       |
| 13 |                      |                     | context of what is already known               |                         |
| 14 |                      |                     |                                                |                         |
| 15 |                      |                     |                                                |                         |
| 16 |                      |                     |                                                |                         |
| 17 | Objectives           | <a href="#">#7</a>  | Provide an explicit statement of the           | 4, Introduction         |
| 18 |                      |                     | question(s) the review will address with       |                         |
| 19 |                      |                     | reference to participants, interventions,      |                         |
| 20 |                      |                     | comparators, and outcomes (PICO)               |                         |
| 21 |                      |                     |                                                |                         |
| 22 |                      |                     |                                                |                         |
| 23 |                      |                     |                                                |                         |
| 24 |                      |                     |                                                |                         |
| 25 |                      |                     |                                                |                         |
| 26 |                      |                     |                                                |                         |
| 27 | <b>Methods</b>       |                     |                                                |                         |
| 28 |                      |                     |                                                |                         |
| 29 |                      |                     |                                                |                         |
| 30 | Eligibility criteria | <a href="#">#8</a>  | Specify the study characteristics (such as     | 4, Study design         |
| 31 |                      |                     | PICO, study design, setting, time frame) and   | 5, Timeframe of         |
| 32 |                      |                     | report characteristics (such as years          | searches                |
| 33 |                      |                     | considered, language, publication status) to   | 6-7, PICO; Context      |
| 34 |                      |                     | be used as criteria for eligibility for the    | (setting)               |
| 35 |                      |                     | review                                         | 5-6, Types of studies;  |
| 36 |                      |                     |                                                | Inclusion and Exclusion |
| 37 |                      |                     |                                                | criteria                |
| 38 |                      |                     |                                                |                         |
| 39 |                      |                     |                                                |                         |
| 40 |                      |                     |                                                |                         |
| 41 |                      |                     |                                                |                         |
| 42 |                      |                     |                                                |                         |
| 43 |                      |                     |                                                |                         |
| 44 |                      |                     |                                                |                         |
| 45 |                      |                     |                                                |                         |
| 46 |                      |                     |                                                |                         |
| 47 |                      |                     |                                                |                         |
| 48 | Information          | <a href="#">#9</a>  | Describe all intended information sources      | 4, Databases            |
| 49 | sources              |                     | (such as electronic databases, contact with    | 5, Timeframe of         |
| 50 |                      |                     | study authors, trial registers or other grey   | searches (dates of      |
| 51 |                      |                     | literature sources) with planned dates of      | coverage)               |
| 52 |                      |                     | coverage                                       |                         |
| 53 |                      |                     |                                                |                         |
| 54 |                      |                     |                                                |                         |
| 55 |                      |                     |                                                |                         |
| 56 |                      |                     |                                                |                         |
| 57 |                      |                     |                                                |                         |
| 58 |                      |                     |                                                |                         |
| 59 |                      |                     |                                                |                         |
| 60 |                      |                     |                                                |                         |



|    |                   |                      |                                                   |                            |
|----|-------------------|----------------------|---------------------------------------------------|----------------------------|
| 1  | Search strategy   | <a href="#">#10</a>  | Present draft of search strategy to be used       | 5, Search strategy and     |
| 2  |                   |                      | for at least one electronic database,             | Supplementary File         |
| 3  |                   |                      | including planned limits, such that it could be   |                            |
| 4  |                   |                      | repeated                                          |                            |
| 5  |                   |                      |                                                   |                            |
| 6  |                   |                      |                                                   |                            |
| 7  |                   |                      |                                                   |                            |
| 8  |                   |                      |                                                   |                            |
| 9  |                   |                      |                                                   |                            |
| 10 |                   |                      |                                                   |                            |
| 11 | Study records -   | <a href="#">#11a</a> | Describe the mechanism(s) that will be used       | 7, Study screening         |
| 12 | data management   |                      | to manage records and data throughout the         | 8-9, Data extraction       |
| 13 |                   |                      | review                                            |                            |
| 14 |                   |                      |                                                   |                            |
| 15 |                   |                      |                                                   |                            |
| 16 |                   |                      |                                                   |                            |
| 17 |                   |                      |                                                   |                            |
| 18 | Study records -   | <a href="#">#11b</a> | State the process that will be used for           | 7, Study screening         |
| 19 | selection process |                      | selecting studies (such as two independent        |                            |
| 20 |                   |                      | reviewers) through each phase of the review       |                            |
| 21 |                   |                      | (that is, screening, eligibility and inclusion in |                            |
| 22 |                   |                      | meta-analysis)                                    |                            |
| 23 |                   |                      |                                                   |                            |
| 24 |                   |                      |                                                   |                            |
| 25 |                   |                      |                                                   |                            |
| 26 |                   |                      |                                                   |                            |
| 27 |                   |                      |                                                   |                            |
| 28 |                   |                      |                                                   |                            |
| 29 |                   |                      |                                                   |                            |
| 30 |                   |                      |                                                   |                            |
| 31 | Study records -   | <a href="#">#11c</a> | Describe planned method of extracting data        | 8-9, Data extraction       |
| 32 | data collection   |                      | from reports (such as piloting forms, done        |                            |
| 33 |                   |                      | independently, in duplicate), any processes       |                            |
| 34 |                   |                      | for obtaining and confirming data from            |                            |
| 35 |                   |                      | investigators                                     |                            |
| 36 |                   |                      |                                                   |                            |
| 37 |                   |                      |                                                   |                            |
| 38 |                   |                      |                                                   |                            |
| 39 |                   |                      |                                                   |                            |
| 40 |                   |                      |                                                   |                            |
| 41 |                   |                      |                                                   |                            |
| 42 |                   |                      |                                                   |                            |
| 43 | Data items        | <a href="#">#12</a>  | List and define all variables for which data      | 6-7, Interventions         |
| 44 |                   |                      | will be sought (such as PICO items, funding       | 7, Main outcome –          |
| 45 |                   |                      | sources), any pre-planned data assumptions        | Timing                     |
| 46 |                   |                      | and simplifications                               | 8-9, Data extraction       |
| 47 |                   |                      |                                                   |                            |
| 48 |                   |                      |                                                   |                            |
| 49 |                   |                      |                                                   |                            |
| 50 |                   |                      |                                                   |                            |
| 51 |                   |                      |                                                   |                            |
| 52 |                   |                      |                                                   |                            |
| 53 | Outcomes and      | <a href="#">#13</a>  | List and define all outcomes for which data       | 7, Main outcome (3,        |
| 54 | prioritization    |                      | will be sought, including prioritization of main  | rationale in Introduction) |
| 55 |                   |                      | and additional outcomes, with rationale           |                            |
| 56 |                   |                      |                                                   |                            |
| 57 |                   |                      |                                                   |                            |
| 58 |                   |                      |                                                   |                            |
| 59 |                   |                      |                                                   |                            |
| 60 |                   |                      |                                                   |                            |

|    |                    |                      |                                                          |                          |
|----|--------------------|----------------------|----------------------------------------------------------|--------------------------|
| 1  | Risk of bias in    | <a href="#">#14</a>  | Describe anticipated methods for assessing               | 8, Risk of bias          |
| 2  |                    |                      |                                                          |                          |
| 3  | individual studies |                      | risk of bias of individual studies, including            | assessment               |
| 4  |                    |                      |                                                          |                          |
| 5  |                    |                      | whether this will be done at the outcome or              |                          |
| 6  |                    |                      | study level, or both; state how this                     |                          |
| 7  |                    |                      |                                                          |                          |
| 8  |                    |                      | information will be used in data synthesis               |                          |
| 9  |                    |                      |                                                          |                          |
| 10 |                    |                      |                                                          |                          |
| 11 |                    |                      |                                                          |                          |
| 12 |                    |                      |                                                          |                          |
| 13 | Data synthesis     | <a href="#">#15a</a> | Describe criteria under which study data will            | 9, Strategy for data     |
| 14 |                    |                      | be quantitatively synthesised                            | synthesis                |
| 15 |                    |                      |                                                          |                          |
| 16 |                    |                      |                                                          |                          |
| 17 |                    |                      |                                                          |                          |
| 18 | Data synthesis     | <a href="#">#15b</a> | If data are appropriate for quantitative                 | 9, Strategy for data     |
| 19 |                    |                      | synthesis, describe planned summary                      | synthesis                |
| 20 |                    |                      | measures, methods of handling data and                   |                          |
| 21 |                    |                      | methods of combining data from studies,                  |                          |
| 22 |                    |                      | including any planned exploration of                     |                          |
| 23 |                    |                      | consistency (such as I <sup>2</sup> , Kendall's $\tau$ ) |                          |
| 24 |                    |                      |                                                          |                          |
| 25 |                    |                      |                                                          |                          |
| 26 |                    |                      |                                                          |                          |
| 27 |                    |                      |                                                          |                          |
| 28 |                    |                      |                                                          |                          |
| 29 |                    |                      |                                                          |                          |
| 30 |                    |                      |                                                          |                          |
| 31 |                    |                      |                                                          |                          |
| 32 |                    |                      |                                                          |                          |
| 33 | Data synthesis     | <a href="#">#15c</a> | Describe any proposed additional analyses                | 9, Analysis of subgroups |
| 34 |                    |                      | (such as sensitivity or subgroup analyses,               |                          |
| 35 |                    |                      | meta-regression)                                         |                          |
| 36 |                    |                      |                                                          |                          |
| 37 |                    |                      |                                                          |                          |
| 38 |                    |                      |                                                          |                          |
| 39 |                    |                      |                                                          |                          |
| 40 |                    |                      |                                                          |                          |
| 41 | Data synthesis     | <a href="#">#15d</a> | If quantitative synthesis is not appropriate,            | n/a – quantitative       |
| 42 |                    |                      | describe the type of summary planned                     | synthesis is applicable  |
| 43 |                    |                      |                                                          |                          |
| 44 |                    |                      |                                                          |                          |
| 45 |                    |                      |                                                          |                          |
| 46 | Meta-bias(es)      | <a href="#">#16</a>  | Specify any planned assessment of meta-                  | 8, Risk of bias          |
| 47 |                    |                      | bias(es) (such as publication bias across                | assessment               |
| 48 |                    |                      | studies, selective reporting within studies)             |                          |
| 49 |                    |                      |                                                          |                          |
| 50 |                    |                      |                                                          |                          |
| 51 |                    |                      |                                                          |                          |
| 52 |                    |                      |                                                          |                          |
| 53 |                    |                      |                                                          |                          |
| 54 | Confidence in      | <a href="#">#17</a>  | Describe how the strength of the body of                 | 8, Risk of bias          |
| 55 |                    |                      | evidence will be assessed (such as GRADE)                | assessment               |
| 56 | cumulative         |                      |                                                          |                          |
| 57 |                    |                      |                                                          |                          |
| 58 |                    |                      |                                                          |                          |
| 59 |                    |                      |                                                          |                          |
| 60 |                    |                      |                                                          |                          |

1 evidence

2  
3 None The PRISMA-P checklist is distributed under the terms of the Creative Commons Attribution

4 License CC-BY 4.0. This checklist can be completed online using <https://www.goodreports.org/>, a tool

5  
6  
7  
8 made by the [EQUATOR Network](#) in collaboration with [Penelope.ai](#)

9  
10  
11  
12  
13  
14  
15  
16  
17  
18  
19  
20  
21  
22  
23  
24  
25  
26  
27  
28  
29  
30  
31  
32  
33  
34  
35  
36  
37  
38  
39  
40  
41  
42  
43  
44  
45  
46  
47  
48  
49  
50  
51  
52  
53  
54  
55  
56  
57  
58  
59  
60

For peer review only
