# Supplementary material for: Quality of life measured by EQ-5D at different treatment time points for coronary artery disease: protocol for a systematic review and meta-analysis
Source: PubMed Central journal article supplement — BMJ Open. 2020 Jul 29;10(7):e039311. doi: 10.1136/bmjopen-2020-039311 (PMC7394179; doi:10.1136/bmjopen-2020-039311), 2020-07-29
Supplement: bmjopen-2020-039311supp001.pdf [file bmjopen-2020-039311supp001.pdf]

**Supplementary File. PubMed search strategy**

|    |                                                                                                                                                                                                                                                                                                                                                                                                                                                                                                                                                                                                                                                                                   |
|----|-----------------------------------------------------------------------------------------------------------------------------------------------------------------------------------------------------------------------------------------------------------------------------------------------------------------------------------------------------------------------------------------------------------------------------------------------------------------------------------------------------------------------------------------------------------------------------------------------------------------------------------------------------------------------------------|
| #1 | ((((((((((((coronary artery disease) OR (coronary heart disease)) OR (coronary artery stenosis)) OR (cardiovascular disease)) OR (myocardial ischemia)) OR (myocardial infarction)) OR (acute coronary syndrome)) OR (angina)) OR (angina pectoris)) OR (chest pain)) OR (silent ischemia)) OR (myocardial ischemia[MeSH Terms]))                                                                                                                                                                                                                                                                                                                                                 |
| #2 | ((((((((((((EQ-5D) OR (EQ-5D-3L)) OR (EQ-5D-5L)) OR (EuroQOL)) OR (European Quality of Life - 5 Dimensions)) OR (European QOL - 5 Dimensions)) OR (EuroQOL five-dimensional questionnaire)) OR (EuroQOL 5D)) OR (Quality of life[MeSH Terms])) OR (Quality-adjusted life years[MeSH Terms])) OR (Cost-benefit analysis[MeSH Terms]))                                                                                                                                                                                                                                                                                                                                              |
| #3 | ((((((((((((((((((((optimal medical treatment) OR (best medical therapy)) OR (coronary revascularization)) OR (myocardial revascularization)) OR (coronary angiography)) OR (coronary artery bypass graft)) OR (CABG)) OR (percutaneous coronary intervention)) OR (PCI)) OR (drug-eluting stent)) OR (Paclitaxel-eluting stent)) OR (Sirolimus-eluting stent)) OR (Everolimus-eluting stent)) OR (bare metal stent)) OR (angioplasty)) OR (myocardial ischemia/drug therapy[MeSH Terms])) OR (myocardial ischemia/surgery[MeSH Terms])) OR (myocardial revascularization[MeSH Terms])) OR (percutaneous coronary intervention[MeSH Terms])) OR (drug-eluting stent[MeSH Terms])) |
| #4 | ((#1) AND (#2)) AND (#3)                                                                                                                                                                                                                                                                                                                                                                                                                                                                                                                                                                                                                                                          |
| #5 | ((((#4) NOT (stroke[MeSH Terms])) NOT (peripheral arterial disease[MeSH Terms])) NOT (venous insufficiency[MeSH Terms])) NOT (atherectomy[MeSH Terms]))                                                                                                                                                                                                                                                                                                                                                                                                                                                                                                                           |
| #6 | ((((#5) NOT (editorial[Publication Type])) NOT (clinical conference[Publication Type])) NOT (letter[Publication Type]))                                                                                                                                                                                                                                                                                                                                                                                                                                                                                                                                                           |
| #7 | (#6) AND (English[Language])                                                                                                                                                                                                                                                                                                                                                                                                                                                                                                                                                                                                                                                      |
| #8 | (#7) AND (("2003/01/01"[Date - Entry] : "2020/03/09"[Date - Entry]))                                                                                                                                                                                                                                                                                                                                                                                                                                                                                                                                                                                                              |
